# Supplementary material for: Increased El Niño amplitude during the last deglacial warming
Source: Research Square preprint supplement (doi:10.21203/rs.3.rs-1303299/v1), 2022-02-17
Supplement: Supplementary file 1 [file e565eb985e1a398be87702b0.xlsx]

## Sheet: Callao Ti-XRF Raw
Cm	Age	Ti (counts)
36	1395.8	7097.6
36.1	1398.05	7380.02
36.2	1400.31	7248.54
36.3	1402.56	7096.89
36.4	1404.81	7096.88
36.5	1407.06	7238.66
36.6	1409.31	7126.31
36.7	1411.56	7251.97
36.8	1413.81	7160.12
36.9	1416.06	7114.89
37	1418.31	6987.19
37.1	1420.56	7249.18
37.2	1422.81	7217.06
37.3	1425.06	6330.91
37.4	1427.31	4581.99
37.5	1429.56	4293.57
37.6	1431.81	6545.42
37.7	1434.06	6892.44
37.8	1436.31	7435.53
37.9	1438.56	6816.64
38	1440.81	8375.62
38.1	1443.06	6575.89
38.2	1445.31	6468.39
38.3	1447.56	6571.4
38.4	1449.81	7483.25
38.5	1452.06	7187.64
38.6	1454.31	7669.51
38.7	1456.56	8374.24
38.8	1458.81	9342.24
38.9	1461.06	7824.24
39	1463.31	8530.74
39.1	1465.56	8301.32
39.2	1467.81	6996.21
39.3	1470.06	9970.72
39.4	1472.31	7043.72
39.5	1474.56	7493.21
39.6	1476.81	6366.33
39.7	1479.06	6105.55
39.8	1481.31	5217.03
39.9	1483.56	4413.97
40	1485.81	3666.83
40.1	1488.06	4167.53
40.2	1490.31	2989.29
40.3	1492.56	2583.22
40.4	1494.81	2668.49
40.5	1497.06	2507.78
40.6	1499.31	2487.58
40.7	1501.56	2647.11
40.8	1503.81	2543.05
40.9	1506.06	2329.3
41	1508.32	2314.71
41.1	1510.57	2239.16
41.2	1512.82	2141.76
41.3	1515.07	2764.99
41.4	1517.32	3251.39
41.5	1519.57	3511.09
41.6	1521.82	2743.64
41.7	1524.07	3236.3
41.8	1526.32	3273.4
41.9	1528.57	3077.21
42	1530.82	2748.98
42.1	1533.07	2501.92
42.2	1535.32	2993.48
42.3	1537.57	2566.58
42.4	1539.82	2280.05
42.5	1542.07	2297.23
42.6	1544.32	3783.13
42.7	1546.57	2790.39
42.8	1548.82	2580.09
42.9	1551.07	2388.01
43	1553.32	1992.3
43.1	1555.57	1566.42
43.2	1557.82	1713.29
43.3	1560.07	3032.3
43.4	1562.32	2182.91
43.5	1564.57	1807.59
43.6	1566.82	1543.37
43.7	1569.07	1972.96
43.8	1571.32	1962.25
43.9	1573.57	2188.35
44	1575.82	2956.17
44.1	1578.07	2620.8
44.2	1580.32	1841.72
44.3	1582.57	1713.58
44.4	1584.82	2008.22
44.5	1587.07	2219.29
44.6	1589.32	1608.39
44.7	1591.57	1926.52
44.8	1593.82	1840.66
44.9	1596.07	1774.52
45	1598.32	1840.93
45.1	1600.57	1619.26
45.2	1602.82	1685.72
45.3	1605.07	1856.1
45.4	1607.32	2469.77
45.5	1609.57	2978.5
45.6	1611.82	2175.05
45.7	1614.08	2684.14
45.8	1616.33	3449.98
45.9	1618.58	2946.27
46	1620.83	2679.77
46.1	1623.08	2164.75
46.2	1625.33	4475.9
46.3	1627.58	6181.64
46.4	1629.83	7134.37
46.5	1632.08	7950.03
46.6	1634.33	7733.5
46.7	1636.58	6697.08
46.8	1638.83	5923.59
46.9	1641.08	4449.05
47	1643.33	4016.9
47.1	1645.58	5756.64
47.2	1647.83	7481.8
47.3	1650.08	7524.69
47.4	1652.33	9066.25
47.5	1654.58	7492.85
47.6	1656.83	8048.54
47.7	1659.08	8687.25
47.8	1661.33	7580.05
47.9	1663.58	7187.01
48	1665.83	7125.05
48.1	1668.08	6596.25
48.2	1670.33	6835.9
48.3	1672.58	8573.64
48.4	1674.83	8047.23
48.5	1677.08	6891.19
48.6	1679.33	6678.79
48.7	1681.58	5831.09
48.8	1683.83	6889.22
48.9	1686.08	6616.54
49	1688.33	8125.49
49.1	1690.58	7318.13
49.2	1692.83	7674.48
49.3	1695.08	6107.55
49.4	1697.33	5128.37
49.5	1699.58	5676.05
49.6	1701.83	5176.44
49.7	1704.08	3883.8
49.8	1706.33	4499.17
49.9	1708.58	4852.08
50	1710.83	4170.26
50.1	1713.08	4080.87
50.2	1715.33	3175.13
50.3	1717.58	3365.28
50.4	1719.83	3382.72
50.5	1722.09	2694.98
50.6	1724.34	2807.99
50.7	1726.59	2834.47
50.8	1728.84	4246.02
50.9	1731.09	4539.12
51	1733.34	4039.32
51.1	1735.59	4510.56
51.2	1737.84	3812.33
51.3	1740.09	3843.08
51.4	1742.34	4996.15
51.5	1744.59	4947.01
51.6	1746.84	5032.09
51.7	1749.09	5289.52
51.8	1751.34	4024.27
51.9	1753.59	4028.64
52	1755.84	9790.8
52.1	1758.09	4380.71
52.2	1760.34	3913.21
52.3	1762.59	3034.09
52.4	1764.84	2768.37
52.5	1767.09	4120.88
52.6	1769.34	4610.25
52.7	1771.59	7283.51
52.8	1773.84	4582.84
52.9	1776.09	4362.24
53	1778.34	5143.09
53.1	1780.59	5764.13
53.2	1782.84	5624.22
53.3	1785.09	5509.65
53.4	1787.34	6706.63
53.5	1789.59	5269.71
53.6	1791.84	4158.74
53.7	1794.09	4064.28
53.8	1796.34	4237.47
53.9	1798.59	4247.2
54	1800.84	3939.9
54.1	1803.09	3911.1
54.2	1805.34	4396.85
54.3	1807.59	5202.05
54.4	1809.84	5447.29
54.5	1812.09	4468.38
54.6	1814.34	5391.37
54.7	1816.59	5111.46
54.8	1818.84	5448.89
54.9	1821.09	5409.06
55	1823.34	5735.38
55.1	1825.59	6587.61
55.2	1827.85	7927.21
55.3	1830.1	8662.69
55.4	1832.35	9369.46
55.5	1834.6	8711.41
55.6	1836.85	9982.33
55.7	1839.1	8348.66
55.8	1841.35	8996.79
55.9	1843.6	10036.3
56	1845.85	8801.49
56.1	1848.1	8354.67
56.2	1850.35	8107.58
56.3	1852.6	8266.1
56.4	1854.85	8397.4
56.5	1857.1	8440.34
56.6	1859.35	8434.26
56.7	1861.6	8292.35
56.8	1863.85	6847.18
56.9	1866.1	8694.11
57	1868.35	6766.59
57.1	1870.6	7650.62
57.2	1872.85	3674.1
57.3	1875.1	1936.8
57.4	1877.35	1635.48
57.5	1879.6	1566.96
57.6	1881.85	2420.26
57.7	1884.1	3240.54
57.8	1886.35	1517.15
57.9	1888.6	2648.39
58	1890.85	1687.8
58.1	1893.1	1380.81
58.2	1895.35	1752.18
58.3	1897.6	1035.61
58.4	1899.85	1055.61
58.5	1902.1	1699.64
58.6	1904.35	2453
58.7	1906.6	6022.57
58.8	1908.85	6470.75
58.9	1911.1	7224.66
59	1913.35	7020.35
59.1	1915.6	5426.07
59.2	1917.85	4834.76
59.3	1920.1	4384.89
59.4	1922.35	3203.19
59.5	1924.6	2921.11
59.6	1926.85	3425.1
59.7	1929.1	3829.83
59.8	1931.35	4030.16
59.9	1933.6	3280.76
60	1935.86	3581.3
60.1	1938.11	3039.5
60.2	1940.36	3050.99
60.3	1942.61	2310.75
60.4	1944.86	4241.55
60.5	1947.11	5201.44
60.6	1949.36	5768.01
60.7	1951.61	6217.64
60.8	1953.86	6191.36
60.9	1956.11	6411.15
61	1958.36	6361.25
61.1	1960.61	6595.08
61.2	1962.86	5622.24
61.3	1965.11	5600.58
61.4	1967.36	5813.96
61.5	1969.61	5167.44
61.6	1971.86	6776.15
61.7	1974.11	7542.05
61.8	1976.36	7084.79
61.9	1978.61	6874.42
62	1980.86	5754.49
62.1	1983.11	6585.59
62.2	1985.36	7234.2
62.3	1987.61	6021.4
62.4	1989.86	6028.08
62.5	1992.11	6503.99
62.6	1994.36	6597.91
62.7	1996.61	6185.77
62.8	1998.86	5741.11
62.9	2001.11	6617.57
63	2003.36	4512.61
63.1	2005.61	2599.91
63.2	2007.86	2605.79
63.3	2010.11	2455.41
63.4	2012.36	2134.24
63.5	2014.61	4029.73
63.6	2016.86	2180.43
63.7	2019.11	2336.11
63.8	2021.36	3489.34
63.9	2023.61	4667.17
64	2025.86	5057.31
64.1	2028.11	5377.54
64.2	2030.36	5693.95
64.3	2032.61	5752.88
64.4	2034.86	5315.83
64.5	2037.11	5327.34
64.6	2039.36	5191.06
64.7	2041.61	6119.83
64.8	2043.87	6034.95
64.9	2046.12	5211.32
65	2048.36	5245.24
65.1	2050.61	4959.29
65.2	2052.87	6009.56
65.3	2055.12	6627.82
65.4	2057.37	6545.99
65.5	2059.62	6813.16
65.6	2061.87	7358.72
65.7	2064.12	9743.9
65.8	2066.37	14346.7
65.9	2068.62	7163.19
66	2070.87	7874.84
66.1	2073.12	8022.28
66.2	2075.37	8636.97
66.3	2077.62	9929.34
66.4	2079.87	8574.78
66.5	2082.12	8201.62
66.6	2084.37	9909.83
66.7	2086.62	8443.66
66.8	2088.87	8216.87
66.9	2091.12	8260.46
67	2093.37	8557.58
67.1	2095.62	6997.01
67.2	2097.87	6531.01
67.3	2100.12	8723.56
67.4	2102.37	7885.5
67.5	2104.62	8428.79
67.6	2106.87	8558.45
67.7	2109.12	7051.79
67.8	2111.37	7877.35
67.9	2113.62	9263.72
68	2115.87	7750.54
68.1	2118.12	8170.51
68.2	2120.37	8655.26
68.3	2122.62	7623.04
68.4	2124.87	7522.41
68.5	2127.12	6858.51
68.6	2129.37	6815.49
68.7	2131.62	6783.11
68.8	2133.87	6532.14
68.9	2136.12	6630.42
69	2138.37	6787.56
69.1	2140.62	7541.86
69.2	2142.87	7571.64
69.3	2145.12	7294.47
69.4	2147.37	6341.64
69.5	2149.62	6663.45
69.6	2151.88	7712.54
69.7	2154.12	7414.33
69.8	2156.38	6266.76
69.9	2158.62	3663.56
70	2160.88	4517.98
70.1	2163.13	3343.16
70.2	2165.38	4173.96
70.3	2167.63	4035.47
70.4	2169.88	4328.44
70.5	2172.13	5160.03
70.6	2174.38	5579.43
70.7	2176.63	3551.52
70.8	2178.88	4998.84
70.9	2181.13	3324.55
71	2183.38	3194.77
71.1	2185.63	2714.79
71.2	2187.88	3087.2
71.3	2190.13	4175.57
71.4	2192.38	4538.57
71.5	2194.63	4691.81
71.6	2196.88	6010.86
71.7	2199.13	3853.3
71.8	2201.38	4272.73
71.9	2203.63	3147.19
72	2205.88	3525.97
72.1	2208.13	3990.49
72.2	2210.38	4344.53
72.3	2212.63	3299.1
72.4	2214.88	4186.33
72.5	2217.13	4020.14
72.6	2219.38	3656.93
72.7	2221.63	6213.33
72.8	2223.88	5294.56
72.9	2226.13	4571.21
73	2228.38	6338.83
73.1	2230.63	4547.58
73.2	2232.88	5087.1
73.3	2235.13	5319.92
73.4	2237.38	6394.29
73.5	2239.63	5423.69
73.6	2241.88	5649.78
73.7	2244.13	5134.09
73.8	2246.38	5138.65
73.9	2248.63	5517.42
74	2250.88	6469.38
74.1	2253.13	6196.7
74.2	2255.38	7068.2
74.3	2257.64	7009.51
74.4	2259.89	5771.39
74.5	2262.14	6198.77
74.6	2264.39	6448.64
74.7	2266.64	6053.3
74.8	2268.89	6739.15
74.9	2271.14	8043.19
75	2273.39	6563.17
75.1	2275.64	6004.42
75.2	2277.89	6285.24
75.3	2280.14	6436.83
75.4	2282.39	6832.91
75.5	2284.64	9683.45
75.6	2286.89	7637.85
75.7	2289.14	7099.12
75.8	2291.39	6741.17
75.9	2293.64	7271.04
76	2295.89	8295.54
76.1	2298.14	7490.02
76.2	2300.39	6988.67
76.3	2302.64	8023.43
76.4	2304.89	8667.93
76.5	2307.14	10664.3
76.6	2309.39	8522.05
76.7	2311.64	8092.08
76.8	2313.89	9541.71
76.9	2316.14	9276.78
77	2318.39	8271.46
77.1	2320.64	8595.11
77.2	2322.89	8989.8
77.3	2325.14	8410.04
77.4	2327.39	8524.38
77.5	2329.64	8212.28
77.6	2331.89	9823.31
77.7	2334.14	13047.5
77.8	2336.39	7392.37
77.9	2338.64	10437.2
78	2340.89	7132.25
78.1	2343.14	7174.46
78.2	2345.39	6412.76
78.3	2347.64	6026.79
78.4	2349.89	7250.56
78.5	2352.14	7069.02
78.6	2354.39	7672.8
78.7	2356.64	7760.54
78.8	2358.89	6985.38
78.9	2361.14	7708.89
79	2363.39	6791.31
79.1	2365.64	7403.77
79.2	2367.89	8967.06
79.3	2370.14	7626.56
79.4	2372.39	8667.74
79.5	2374.65	7836.62
79.6	2376.9	6773.58
79.7	2379.15	6395.96
79.8	2381.4	7971.51
79.9	2383.65	8408.95
80	2385.9	7491.6
80.1	2388.15	8970.8
80.2	2390.4	8287.63
80.3	2392.65	7557.9
80.4	2394.9	6840.67
80.5	2397.15	6272.99
80.6	2399.4	6245.75
80.7	2401.65	6277.96
80.8	2403.9	7458.51
80.9	2406.15	6603.71
81	2408.4	7061.78
81.1	2410.65	7613.49
81.2	2412.9	7196.54
81.3	2415.15	7882.21
81.4	2417.4	6772.74
81.5	2419.65	7333.33
81.6	2421.9	6298.67
81.7	2424.15	7570.53
81.8	2426.4	6542.76
81.9	2428.65	7991.1
82	2430.9	6499.72
82.1	2433.15	7953.66
82.2	2435.4	8362.67
82.3	2437.65	8228.13
82.4	2439.9	8162.51
82.5	2442.15	7067.69
82.6	2444.4	8960.06
82.7	2446.65	11540.7
82.8	2448.9	9191.53
82.9	2451.15	10933.1
83	2453.4	8352.76
83.1	2455.65	7649.65
83.2	2457.9	8376.92
83.3	2460.15	8067.69
83.4	2462.4	9645.7
83.5	2464.65	8447.15
83.6	2466.9	8519.61
83.7	2469.15	7585.98
83.8	2471.41	8584.6
83.9	2473.66	9290.11
84	2475.91	9206.3
84.1	2478.16	7720.3
84.2	2480.41	6550.22
84.3	2482.66	9620.41
84.4	2484.91	8418.75
84.5	2487.16	9654.43
84.6	2489.41	8749.93
84.7	2491.66	8929.13
84.8	2493.91	8690.38
84.9	2496.16	8730.17
85	2498.41	8888.48
85.1	2500.66	8816.45
85.2	2502.91	8374.19
85.3	2505.16	9712.44
85.4	2507.41	7964.21
85.5	2509.66	10399.8
85.6	2511.91	8883.71
85.7	2514.16	9873.31
85.8	2516.41	8735.1
85.9	2518.66	7270.46
86	2520.91	7622.05
86.1	2523.16	7139.14
86.2	2525.41	9031.94
86.3	2527.66	9795.7
86.4	2529.91	9101.57
86.5	2532.16	10967.9
86.6	2534.41	9897.63
86.7	2536.66	8138.36
86.8	2538.91	8371.84
86.9	2541.16	7801.78
87	2543.41	8559.58
87.1	2545.66	8243.68
87.2	2547.91	7947.34
87.3	2550.16	6523.4
87.4	2552.41	7132.53
87.5	2554.66	7200.68
87.6	2556.91	7994.98
87.7	2559.16	7864.07
87.8	2561.41	6614.71
87.9	2563.66	7794.26
88	2565.91	7286.58
88.1	2568.16	6505.43
88.2	2570.41	6219
88.3	2572.66	8247.36
88.4	2574.91	8968.15
88.5	2577.16	14050.4
88.6	2579.41	14564.1
88.7	2581.66	13580.1
88.8	2583.91	10620.5
88.9	2586.16	7312.39
89	2588.42	6658.84
89.1	2590.67	15296.4
89.2	2592.92	13657.4
89.3	2595.17	10997
89.4	2597.42	7194.66
89.5	2599.67	6962.84
89.6	2601.92	5498.82
89.7	2604.17	7636.13
89.8	2606.42	7372.66
89.9	2608.67	8055.59
90	2610.92	9519.96
90.1	2613.17	9320.12
90.2	2615.42	9358.88
90.3	2617.67	10044.9
90.4	2619.92	6956.1
90.5	2622.17	5721.9
90.6	2624.42	6529.96
90.7	2626.67	7950.16
90.8	2628.92	8544.88
90.9	2631.17	6529.79
91	2633.42	8152.79
91.1	2635.67	6428.87
91.2	2637.92	6910.66
91.3	2640.17	8189.27
91.4	2642.42	7710.66
91.5	2644.67	9239.42
91.6	2646.92	8368.01
91.7	2649.17	7338.33
91.8	2651.42	8006.82
91.9	2653.67	7765.86
92	2655.92	11360.7
92.1	2658.17	8177.46
92.2	2660.42	12866.5
92.3	2662.67	8392
92.4	2664.92	11858.5
92.5	2667.17	15932.6
92.6	2669.42	7747.34
92.7	2671.67	10761.5
92.8	2673.92	9378.03
92.9	2676.17	6860.04
93	2678.42	9224.21
93.1	2680.67	6883.51
93.2	2682.92	9092.96
93.3	2685.18	9043.44
93.4	2687.43	11073
93.5	2689.68	7915.86
93.6	2691.93	7553.87
93.7	2694.18	6003.11
93.8	2696.43	8380
93.9	2698.68	5537.51
102.9	13000.2	6295.07
103	13001	7130.41
103.1	13001.8	7189.65
103.2	13002.7	8226.4
103.3	13003.5	8929.76
103.4	13004.3	8468.25
103.5	13005.1	8023.67
103.6	13006	7094.37
103.7	13006.8	7735.54
103.8	13007.6	9470.21
103.9	13008.4	7752.93
104	13009.2	8289.23
104.1	13010.1	7545.57
104.2	13010.9	7034.89
104.3	13011.7	7511.93
104.4	13012.5	7601.29
104.5	13013.4	7783.29
104.6	13014.2	8067.56
104.7	13015	7046.58
104.8	13015.8	6816.4
104.9	13016.7	7832.52
105	13017.5	7267.52
105.1	13018.3	9446.15
105.2	13019.1	6454.58
105.3	13020	7357.99
105.4	13020.8	7738
105.5	13021.6	7147.49
105.6	13022.4	7545.55
105.7	13023.2	7068.45
105.8	13024.1	7837.16
105.9	13024.9	7991.27
106	13025.7	9424.49
106.1	13026.5	7583.88
106.2	13027.4	9311.63
106.3	13028.2	6547.17
106.4	13029	9436.99
106.5	13029.8	7691.83
106.6	13030.7	7985.38
106.7	13031.5	6462.42
106.8	13032.3	6648.9
106.9	13033.1	6827.24
107	13034	8295.97
107.1	13034.8	7850.75
107.2	13035.6	7754.18
107.3	13036.4	7167.17
107.4	13037.2	10093.1
107.5	13038.1	6451.12
107.6	13038.9	7330.15
107.7	13039.7	6536.03
107.8	13040.5	6972.28
107.9	13041.4	8451.99
108	13042.2	6184.69
108.1	13043	5619.97
108.2	13043.8	5698.29
108.3	13044.7	7428.87
108.4	13045.5	8937.71
108.5	13046.3	9436.81
108.6	13047.1	7166.72
108.7	13048	6771.15
108.8	13048.8	6108.97
108.9	13049.6	6396.69
109	13050.4	6630.86
109.1	13051.2	6568.57
109.2	13052.1	6443.06
109.3	13052.9	6236.88
109.4	13053.7	6149.91
109.5	13054.5	6805.68
109.6	13055.4	6385.44
109.7	13056.2	5163.79
109.8	13057	5706.85
109.9	13057.8	6211.26
110	13058.7	6509.4
110.1	13059.5	6944.98
110.2	13060.3	6039.82
110.3	13061.1	6111.67
110.4	13062	5642.84
110.5	13062.8	7117.04
110.6	13063.6	6343.05
110.7	13064.4	6363.34
110.8	13065.2	5692.26
110.9	13066.1	6932.32
111	13066.9	6201.88
111.1	13067.7	7114.94
111.2	13068.5	6282.68
111.3	13069.4	7280.99
111.4	13070.2	6011.93
111.5	13071	6699.76
111.6	13071.8	6031.14
111.7	13072.7	6084.69
111.8	13073.5	5239.36
111.9	13074.3	6345.19
112	13075.1	5539.47
112.1	13076	6266.33
112.2	13076.8	6135.48
112.3	13077.6	5462.26
112.4	13078.4	5514.9
112.5	13079.2	5784.08
112.6	13080.1	5436.73
112.7	13080.9	5254.48
112.8	13081.7	5033.27
112.9	13082.5	4785.28
113	13083.4	5940.26
113.1	13084.2	5466.8
113.2	13085	6698.27
113.3	13085.8	7264.93
113.4	13086.7	5849.01
113.5	13087.5	5245.26
113.6	13088.3	5081.86
113.7	13089.1	9906.22
113.8	13090	5532.08
113.9	13090.8	6060.12
114	13091.6	5359.76
114.1	13092.4	5469.27
114.2	13093.2	6073.02
114.3	13094.1	5068.05
114.4	13094.9	5292.46
114.5	13095.7	5382.19
114.6	13096.5	4942.12
114.7	13097.4	5326.58
114.8	13098.2	6730.87
114.9	13099	5461.8
115	13099.8	8095.73
115.1	13100.6	5337.18
115.2	13101.5	5486.91
115.3	13102.3	6099.25
115.4	13103.1	5023.12
115.5	13104	6302.81
115.6	13104.8	5979.79
115.7	13105.6	7546.63
115.8	13106.4	6230.92
115.9	13107.2	6103.47
116	13108.1	7984.04
116.1	13108.9	6770.14
116.2	13109.7	7639.87
116.3	13110.5	6910.59
116.4	13111.4	5267.03
116.5	13112.2	7890.98
116.6	13113	8159.8
116.7	13113.8	6966.16
116.8	13114.6	7369.73
116.9	13115.5	6547.47
117	13116.3	8875.08
117.1	13117.1	7544.67
117.2	13118	7533.89
117.3	13118.8	7791.52
117.4	13119.6	9062.24
117.5	13120.4	7872.04
117.6	13121.2	8151.21
117.7	13122.1	7448
117.8	13122.9	17505.1
117.9	13123.7	10392.8
118	13124.5	8512.84
118.1	13125.4	6926.13
118.2	13126.2	5297.07
118.3	13127	6260.33
118.4	13127.8	9450.73
118.5	13128.6	6384.71
118.6	13129.5	6335.15
118.7	13130.3	6100.01
118.8	13131.1	6467.25
118.9	13131.9	5800.79
119	13132.8	9395.2
119.1	13133.6	12173.4
119.2	13134.4	9220.82
119.3	13135.2	5539.65
119.4	13136.1	5948.29
119.5	13136.9	8094.98
119.6	13137.7	6118.83
119.7	13138.5	7709.89
119.8	13139.4	6927.46
119.9	13140.2	6803.89
120	13141	7149.76
120.1	13141.8	6091.54
120.2	13142.6	6155.7
120.3	13143.5	8576.03
120.4	13144.3	8565.51
120.5	13145.1	6928.44
120.6	13145.9	5877.67
120.7	13146.8	6584.6
120.8	13147.6	7359.11
120.9	13148.4	5803.05
121	13149.2	8057.53
121.1	13150.1	6730.15
121.2	13150.9	5618.68
121.3	13151.7	6503.35
121.4	13152.5	5016.5
121.5	13153.4	9004.91
121.6	13154.2	8402.76
121.7	13155	5639.05
121.8	13155.8	5529.4
121.9	13156.6	5349.76
122	13157.5	6843.05
122.1	13158.3	6625.72
122.2	13159.1	5787.57
122.3	13159.9	5498.26
122.4	13160.8	7373.8
122.5	13161.6	12488.9
122.6	13162.4	6879.81
122.7	13163.2	4931.12
122.8	13164.1	4763.04
122.9	13164.9	4761.72
123	13165.7	4282.36
123.1	13166.5	5075.57
123.2	13167.4	5690.93
123.3	13168.2	4991.37
123.4	13169	7539.72
123.5	13169.8	6369.65
123.6	13170.6	7293.42
123.7	13171.5	8093.72
123.8	13172.3	6134.77
123.9	13173.1	6066.28
124	13173.9	5452.71
124.1	13174.8	8258.12
124.2	13175.6	6759.9
124.3	13176.4	6600.11
124.4	13177.2	8012.83
124.5	13178	6791.82
124.6	13178.9	7553.31
124.7	13179.7	5954.31
124.8	13180.5	9706.06
124.9	13181.4	6262.28
125	13182.2	5404.37
125.1	13183	5932.34
125.2	13183.8	8170.21
125.3	13184.6	6689.67
125.4	13185.5	7460.88
125.5	13186.3	8524.28
125.6	13187.1	10203.9
125.7	13187.9	9711.5
125.8	13188.8	9490.67
125.9	13189.6	7311.86
126	13190.4	5477.73
126.1	13191.2	8958.07
126.2	13192	10824.4
126.3	13192.9	9762.78
126.4	13193.7	9381.63
126.5	13194.5	9604.28
126.6	13195.4	8228.08
126.7	13196.2	8862.25
126.8	13197	10759.5
126.9	13197.8	12676.5
127	13198.6	7715.81
127.1	13199.5	7693.19
127.2	13200.3	9098.39
127.3	13201.1	15375.9
127.4	13201.9	13126
127.5	13202.8	10349.4
127.6	13203.6	12083
127.7	13204.4	15153
127.8	13205.2	12477.2
127.9	13206	9504.05
128	13206.9	13858.9
128.1	13207.7	10303.6
128.2	13208.5	11366.6
128.3	13209.3	12336.3
128.4	13210.2	9590.48
128.5	13211	11468.5
128.6	13211.8	10242.6
128.7	13212.6	11307.9
128.8	13213.5	10525.9
128.9	13214.3	11921.2
129	13215.1	9714.08
129.1	13215.9	11813.6
129.2	13216.8	8352.6
129.3	13217.6	7533.68
129.4	13218.4	9349.05
129.5	13219.2	10125.1
129.6	13220	8258.14
129.7	13220.9	10207.8
129.8	13221.7	21776.3
129.9	13222.5	10454.6
130	13223.3	7715.82
130.1	13224.2	9696.9
130.2	13225	9517.71
130.3	13225.8	8334.39
130.4	13226.6	9317.29
130.5	13227.5	10521.5
130.6	13228.3	9326.79
130.7	13229.1	10128.1
130.8	13229.9	12214.7
130.9	13230.8	9824.35
131	13231.6	6717.08
131.1	13232.4	7046.38
131.2	13233.2	7038.04
131.3	13234	7229.56
131.4	13234.9	7075.32
131.6	13236.5	8951.73
131.7	13237.3	7250.89
131.8	13238.2	8586.65
131.9	13239	10210.4
132	13239.8	7755.82
132.1	13240.6	7333.51
132.2	13241.5	10034
132.3	13242.3	12734
132.4	13243.1	7932.39
132.5	13243.9	7502.82
132.6	13244.8	8316.57
132.7	13245.6	7476
132.8	13246.4	8267.86
132.9	13247.2	10968.6
133	13248	7078.41
133.1	13248.9	7898.72
133.2	13249.7	8616.01
133.3	13250.5	6729.19
133.4	13251.3	8881.36
133.5	13252.2	7113.49
133.6	13253	7676.38
133.7	13253.8	9065.74
133.8	13254.6	8993.16
133.9	13255.5	9642.7
134	13256.3	10353.3
134.1	13257.1	9619.07
134.2	13257.9	10565.2
134.3	13258.8	9829.83
134.4	13259.6	10691.3
134.5	13260.4	13425.4
134.6	13261.2	10516.1
134.7	13262	11494.8
134.8	13262.9	11645.4
134.9	13263.7	11949
135	13264.5	16817.1
135.1	13265.3	12260.8
135.2	13266.2	11562.4
135.3	13267	9208.78
135.4	13267.8	14330.8
135.5	13268.6	12095.4
135.6	13269.5	9722.15
135.7	13270.3	10505.4
135.8	13271.1	11231.1
135.9	13271.9	9314.16
136	13272.8	10644.7
136.1	13273.6	10011.5
136.2	13274.4	8885.85
136.3	13275.2	10731.4
136.4	13276	12271.9
136.5	13276.9	9216.21
136.6	13277.7	12363.8
136.7	13278.5	9703.64
136.8	13279.3	10608.3
136.9	13280.2	12189.5
137	13281	10906.7
137.1	13281.8	11696
137.2	13282.6	13119.1
137.3	13283.5	10943.2
137.4	13284.3	10701.7
137.5	13285.1	11760.1
137.6	13285.9	13018.5
137.7	13286.7	6181.99
137.8	13287.6	14220.3
137.9	13288.4	9206.94
138	13289.2	10780.9
138.1	13290	14243.9
138.2	13290.9	15147.4
138.3	13291.7	11104.1
138.4	13292.5	15067.8
138.5	13293.3	10364.4
138.6	13294.1	9434.95
138.7	13295	11225.7
138.8	13295.8	9067.63
138.9	13296.6	15060.5
139	13297.5	7748.68
139.1	13298.3	8623.18
139.2	13299.1	8574.48
139.3	13299.9	8388.11
139.4	13300.7	9441.36
139.5	13301.6	11218.1
139.6	13302.4	9016.75
139.7	13303.2	9252.75
139.8	13304	8332.86
139.9	13304.9	9378.7
140	13305.7	9001.57
140.1	13306.5	8642
140.2	13307.3	10286.6
140.3	13308.1	9563.86
140.4	13309	9669.31
140.5	13309.8	9328.63
140.6	13310.6	9571.3
140.7	13311.5	12927.3
140.8	13312.3	8897.87
140.9	13313.1	7576.23
141	13313.9	7918.14
141.1	13314.7	8805.07
141.2	13315.6	8983.55
141.3	13316.4	9044.22
141.4	13317.2	8430.43
141.5	13318	10008.8
141.6	13318.9	8873.77
141.7	13319.7	8973.62
141.8	13320.5	8544.27
141.9	13321.3	8043.01
142	13322.1	9789.44
142.1	13323	16133.1
142.2	13323.8	12759.7
142.3	13324.6	7712.53
142.4	13325.4	7060.99
142.5	13326.3	8942.88
142.6	13327.1	8986.01
142.7	13327.9	10160.1
142.8	13328.7	8089.21
142.9	13329.6	8465.28
143	13330.4	9212.28
143.1	13331.2	8492.71
143.2	13332	10507.4
143.3	13332.9	10031.6
143.4	13333.7	11505.9
143.5	13334.5	11367.3
143.6	13335.3	7940.99
143.7	13336.1	8645.24
143.8	13337	10875.7
143.9	13337.8	9765.83
144	13338.6	9678.27
144.1	13339.4	10354.1
144.2	13340.3	10242.7
144.3	13341.1	8484.03
144.4	13341.9	8140.46
144.5	13342.7	9086.84
144.6	13343.6	9037.97
144.7	13344.4	8196.18
144.8	13345.2	9116.28
144.9	13346	10924
145	13346.9	8155.55
145.1	13347.7	8957.52
145.2	13348.5	7656.99
145.3	13349.3	9011.06
145.4	13350.1	11366.9
145.5	13351	8671.72
145.6	13351.8	7260.84
145.7	13352.6	7095.87
145.8	13353.4	8482.37
145.9	13354.3	11870.8
146	13355.1	9577.02
146.1	13355.9	10550.5
146.2	13356.7	8821.83
146.3	13357.6	8581.7
146.4	13358.4	6363.94
146.5	13359.2	6789.07
146.6	13360	8297.5
146.7	13360.9	9795.89
146.8	13361.7	9051.74
146.9	13362.5	8641.86
147	13363.3	8474.02
147.1	13364.1	8957.65
147.2	13365	8402.18
147.3	13365.8	9351.29
147.4	13366.6	21062.4
147.5	13367.4	7485.31
147.6	13368.3	9636.13
147.7	13369.1	10222.8
147.8	13369.9	9248.8
147.9	13370.7	9441.67
148	13371.6	11419.2
148.1	13372.4	10197.5
148.2	13373.2	15774.4
148.3	13374	8549.01
148.4	13374.9	8246.21
148.5	13375.7	9906.12
148.6	13376.5	7636.65
148.7	13377.3	8340.49
148.8	13378.1	8836.77
148.9	13379	8223.53
149	13379.8	9287.59
149.1	13380.6	8198.16
149.2	13381.4	9486.97
149.3	13382.3	11743.5
149.4	13383.1	9494.83
149.5	13383.9	8327.13
149.6	13384.7	7994.15
149.7	13385.5	10389
149.8	13386.4	8380.11
149.9	13387.2	10458
150	13388	12744.1
150.1	13388.9	10463.8
150.2	13389.7	9480.9
150.3	13390.5	8702.32
150.4	13391.3	9684.96
150.5	13392.1	12304.8
150.6	13393	13164.9
150.7	13393.8	9591.18
150.8	13394.6	9254.15
150.9	13395.4	10796.6
151	13396.3	10372.5
151.1	13397.1	12523.1
151.2	13397.9	8910.58
151.3	13398.7	9284.6
151.4	13399.5	10575.2
151.5	13400.4	12165.8
151.6	13401.2	13981.9
151.7	13402	17134.2
151.8	13402.8	10130.1
151.9	13403.7	11056.7
152	13404.5	9540.36
152.1	13405.3	10505
152.2	13406.1	13245.6
152.3	13407	11315.4
152.4	13407.8	12832.1
152.5	13408.6	16074.1
152.6	13409.4	12061.9
152.7	13410.3	13357.1
152.8	13411.1	9806.3
152.9	13411.9	9542.03
153	13412.7	10267.9
153.1	13413.5	21161.4
153.2	13414.4	13306.5
153.3	13415.2	8191.5
153.4	13416	9065.44
153.5	13416.8	11503.8
153.6	13417.7	15111.5
153.7	13418.5	16459.5
153.8	13419.3	12773.9
153.9	13420.1	12770.7
154	13421	14999.9
154.1	13421.8	12573.8
154.2	13422.6	10655.9
154.3	13423.4	10460.7
154.4	13424.2	8093.06
154.5	13425.1	9891.98
154.6	13425.9	8064.06
154.7	13426.7	8450.36
154.8	13427.5	8426.98
154.9	13428.4	9535.82
155	13429.2	7011.27
155.1	13430	7098.87
155.2	13430.8	7645.55
155.3	13431.7	7307.68
155.4	13432.5	6249.32
155.5	13433.3	7415.28
155.6	13434.1	6898.83
155.7	13435	6015.43
155.8	13435.8	6430.68
155.9	13436.6	6348.8
156	13437.4	8440.84
156.1	13438.2	18111.5
156.2	13439.1	9260.67
156.3	13439.9	9175.98
156.4	13440.7	8315.74
156.5	13441.5	8675.55
156.6	13442.4	8427
156.7	13443.2	9228.59
156.8	13444	7600.27
156.9	13444.8	8160.34
157	13445.7	9005.01
157.1	13446.5	10931.4
157.2	13447.3	8004.56
157.3	13448.1	7932.48
157.4	13449	8287.78
157.5	13449.8	7040.23
157.6	13450.6	11118.5
157.7	13451.4	7900.36
157.8	13452.2	8137.19
157.9	13453.1	10296.4
158	13453.9	14067.1
158.1	13454.7	8391.1
158.2	13455.5	8809.92
158.3	13456.4	6623.52
158.4	13457.2	7691.9
158.5	13458	8538.6
158.6	13458.8	8623.68
158.7	13459.7	9619.56
158.8	13460.5	9721.21
158.9	13461.3	9023.81
159	13462.1	9653.35
159.1	13463	10261.8
159.2	13463.8	8686.56
159.3	13464.6	10000.7
159.4	13465.4	8884.27
159.5	13466.2	8726.58
159.6	13467.1	9969.98
159.7	13467.9	11086.8
159.8	13468.7	9236.49
159.9	13469.5	10352.5
160	13470.4	11227.8
160.1	13471.2	10250.1
160.2	13472	12077.5
160.3	13472.8	12265.5
160.4	13473.7	10975.3
160.5	13474.5	7560.8
160.6	13475.3	8140.33
160.7	13476.1	8995.19
160.8	13477	9052.88
160.9	13477.8	8274.51
161	13478.6	9838.59
161.1	13479.4	9956.69
161.2	13480.2	7805.92
161.3	13481.1	7673.62
161.4	13481.9	8781.18
161.5	13482.7	8961.39
161.6	13483.5	7647.79
161.7	13484.4	8704.24
161.8	13485.2	12156.1
161.9	13486	9654.33
162	13486.8	9540.89
162.1	13487.7	8159.3
162.2	13488.5	8516.25
162.3	13489.3	10756
162.4	13490.1	9720
162.5	13491	11686.8
162.6	13491.8	10436.5
162.7	13492.6	12729.7
162.8	13493.4	9637.74
162.9	13494.2	12707.1
163	13495.1	8820.82
163.1	13495.9	8696.06
163.2	13496.7	15655.2
163.3	13497.5	8739.01
163.4	13498.4	14911
163.5	13499.2	10355.1
163.6	13500	7831.65
163.7	13500.8	11579
163.8	13501.6	11767.2
163.9	13502.5	10729.5
164	13503.3	9632.6
164.1	13504.1	9347.74
164.2	13505	11992.8
164.3	13505.8	9839.38
164.4	13506.6	9628.26
164.5	13507.4	10348.4
164.6	13508.2	10912.6
164.7	13509.1	10936.4
164.8	13509.9	8003.27
164.9	13510.7	7987.62
165	13511.5	18832.9
165.1	13512.4	9070.93
165.2	13513.2	8635.8
165.3	13514	8564.81
165.4	13514.8	10855.9
165.5	13515.6	13099.2
165.6	13516.5	8665.48
165.7	13517.3	9740.61
165.8	13518.1	8396.78
165.9	13519	7770.67
166	13519.8	8721.73
166.1	13520.6	7892
166.2	13521.4	7981.66
166.3	13522.2	8892.56
166.4	13523.1	14236.2
166.5	13523.9	9889.26
166.6	13524.7	12830.2
166.7	13525.5	8705.73
166.8	13526.4	13323.9
166.9	13527.2	10718.1
167	13528	12671.2
167.1	13528.8	6832.08
167.2	13529.6	8682.73
167.3	13530.5	10667.9
167.4	13531.3	9740.38
167.5	13532.1	11929.4
167.6	13532.9	10302.5
167.7	13533.8	9917.91
167.8	13534.6	10329.4
167.9	13535.4	9158.71
168	13536.2	10183.6
168.1	13537.1	9087.63
168.2	13537.9	11809.6
168.3	13538.7	10355.6
168.4	13539.5	9031.95
168.5	13540.4	9917.76
168.6	13541.2	9606.38
168.7	13542	8425.61
168.8	13542.8	7684.58
168.9	13543.6	9411.99
169	13544.5	10218.7
169.1	13545.3	7740.52
169.2	13546.1	15436.9
169.3	13546.9	16669.4
169.4	13547.8	7829.85
169.5	13548.6	10328.2
169.6	13549.4	8008.55
169.7	13550.2	10770
169.8	13551.1	15957.6
169.9	13551.9	7820.22
170	13552.7	9399.1
170.1	13553.5	12048.5
170.2	13554.4	10396.1
170.3	13555.2	9436.85
170.4	13556	8640.23
170.5	13556.8	8729.25
170.6	13557.6	10427.7
170.7	13558.5	9288.53
170.8	13559.3	13670.7
170.9	13560.1	10740.3
171	13560.9	9696.29
171.1	13561.8	9686.74
171.2	13562.6	7412.67
171.3	13563.4	9389.59
171.4	13564.2	7989.81
171.5	13565.1	8694.71
171.6	13565.9	10851.4
171.7	13566.7	9996.16
171.8	13567.5	8459.85
171.9	13568.4	8895.59
172	13569.2	8517.08
172.1	13570	9370.73
172.2	13570.8	13235.5
172.3	13571.6	8872.83
172.4	13572.5	7339.17
172.5	13573.3	6311.31
172.6	13574.1	9396.46
172.7	13574.9	8570.44
172.8	13575.8	6225.46
172.9	13576.6	7509.6
173	13577.4	7367.04
173.1	13578.2	7848.05
173.2	13579	6688.78
173.3	13579.9	10700.9
173.4	13580.7	9348.95
173.5	13581.5	8294.29
173.6	13582.4	8077.45
173.7	13583.2	8537.03
173.8	13584	8673.33
173.9	13584.8	8326.92
174	13585.6	8720.19
174.1	13586.5	9479.89
174.2	13587.3	7726.9
174.3	13588.1	6633.57
174.4	13588.9	6241.53
174.5	13589.8	6484.91
174.6	13590.6	10379.1
174.7	13591.4	8259.1
174.8	13592.2	14347.8
174.9	13593	11047.8
175	13593.9	10789.7
175.1	13594.7	7659.74
175.2	13595.5	8984.58
175.3	13596.4	11204.5
175.4	13597.2	9926.21
175.5	13598	12353.8
175.6	13598.8	11457.1
175.7	13599.6	9031.53
175.8	13600.5	8902.99
175.9	13601.3	11224.4
176	13602.1	9471.45
176.1	13602.9	9277.43
176.2	13603.8	12269.2
176.3	13604.6	7762.67
176.4	13605.4	11104.4
176.5	13606.2	8452.75
176.6	13607	8791.27
176.7	13607.9	9320.72
176.8	13608.7	8730.33
176.9	13609.5	10006.2
177	13610.3	8576.65
177.1	13611.2	8375.21
177.2	13612	7925.3
177.3	13612.8	8012.96
177.4	13613.6	9348.49
177.5	13614.5	7249.71
177.6	13615.3	6866.91
177.7	13616.1	7881.98
177.8	13616.9	9630.12
177.9	13617.8	8019.49
178	13618.6	6747.78
178.1	13619.4	6561.88
178.2	13620.2	7818.2
178.3	13621	10655.5
178.4	13621.9	9352.26
178.5	13622.7	8990.75
178.6	13623.5	12305.4
178.7	13624.3	8352.48
178.8	13625.2	9763.64
178.9	13626	8328.61
179	13626.8	8986.65
179.1	13627.6	9701.14
179.2	13628.5	8288.22
179.3	13629.3	9433.59
179.4	13630.1	8001.93
179.5	13630.9	8865.17
179.6	13631.8	8191.81
179.7	13632.6	7604.13
179.8	13633.4	8053.56
179.9	13634.2	7894.27
180	13635	7799
180.1	13635.9	7857.29
180.2	13636.7	10356.1
180.3	13637.5	13075.8
180.4	13638.3	12586.3
180.5	13639.2	10611.7
180.6	13640	9072.74
180.7	13640.8	8911.58
180.8	13641.6	10722.4
180.9	13642.5	10125.7
181	13643.3	14604.9
181.1	13644.1	11833.6
181.2	13644.9	8554.52
181.3	13645.8	17542
181.4	13646.6	8928.76
181.5	13647.4	9878.35
181.6	13648.2	12011.7
181.7	13649	9460.44
181.8	13649.9	9109.84
181.9	13650.7	10965.6
182	13651.5	13556.8
182.1	13652.3	9548.38
182.2	13653.2	10925.9
182.3	13654	9210.34
182.4	13654.8	11755.7
182.5	13655.6	9755.38
182.6	13656.5	11976.3
182.7	13657.3	9062.19
182.8	13658.1	13987.7
182.9	13658.9	10220.2
183	13659.8	10189.8
183.1	13660.6	8861.05
183.2	13661.4	9509.9
183.3	13662.2	11967.2
183.4	13663	19047.3
183.5	13663.9	10085.6
183.6	13664.7	12897.4
183.7	13665.5	13345.6
183.8	13666.3	11443.4
183.9	13667.2	13411.5
184	13668	11386.3
184.1	13668.8	9500.79
184.2	13669.6	14156
184.3	13670.5	11976.2
184.4	13671.3	15610.6
184.5	13672.1	19100.6
184.6	13672.9	10211.6
184.7	13673.8	14591
184.8	13674.6	17590.7
184.9	13675.4	14798.1
185	13676.2	10407.3
185.1	13677	12175.7
185.2	13677.9	12535.8
185.3	13678.7	15482
185.4	13679.5	19528.7
185.5	13680.3	18765.4
185.6	13681.2	16239.7
185.7	13682	13483.3
185.8	13682.8	12228.9
185.9	13683.6	10484.1
186	13684.5	13868.5
186.1	13685.3	12118.1
186.2	13686.1	10418.1
186.3	13686.9	11247.9
186.4	13687.7	11547.4
186.5	13688.6	11359.6
186.6	13689.4	10977.1
186.7	13690.2	12431.6
186.8	13691	10499.7
186.9	13691.9	13601.2
187	13692.7	11087.2
187.1	13693.5	10115.9
187.2	13694.3	10051.4
187.3	13695.2	11065.8
187.4	13696	13626.9
187.5	13696.8	9324.61
187.6	13697.6	10829.6
187.7	13698.5	9320.35
187.8	13699.3	11367.7
187.9	13700.1	10207.9
188	13700.9	9472.67
188.1	13701.7	9461.51
188.2	13702.6	9324.43
188.3	13703.4	9877.26
188.4	13704.2	10474
188.5	13705	10645.9
188.6	13705.9	9466.61
188.7	13706.7	10631.5
188.8	13707.5	10515.6
188.9	13708.3	11209.6
189	13709.1	10282.4
189.1	13710	12884.7
189.2	13710.8	9000.83
189.3	13711.6	11614.9
189.4	13712.5	12017.6
189.5	13713.3	12729.6
189.6	13714.1	10842.9
189.7	13714.9	10703.8
189.8	13715.7	9187.69
189.9	13716.6	7990.89
190	13717.4	8709.79
190.1	13718.2	9641.08
190.2	13719	8508.36
190.3	13719.9	8378.23
190.4	13720.7	8069.76
190.5	13721.5	8565.29
190.6	13722.3	8753.41
190.7	13723.1	7731.19
190.8	13724	6558.02
190.9	13724.8	7360.86
191	13725.6	7987.45
191.1	13726.5	6705.59
191.2	13727.3	5430.46
191.3	13728.1	5660.1
191.4	13728.9	4767.59
191.5	13729.7	6009.13
191.6	13730.6	7525.64
191.7	13731.4	10205.3
191.8	13732.2	7068.7
191.9	13733	7680.6
192	13733.9	10755.1
192.1	13734.7	9331.68
192.2	13735.5	8178.66
192.3	13736.3	10667.1
192.4	13737.1	8557.17
192.5	13738	8874.16
192.6	13738.8	9204
192.7	13739.6	9480.71
192.8	13740.4	7621.99
192.9	13741.3	8799.67
193	13742.1	11652.3
193.1	13742.9	10530.5
193.2	13743.7	8779.32
193.3	13744.6	9684.32
193.4	13745.4	9937.94
193.5	13746.2	9355.93
193.6	13747	10685.5
193.7	13747.9	13161.3
193.8	13748.7	10909
193.9	13749.5	10186.1
194	13750.3	11714.4
194.1	13751.1	12107.5
194.2	13752	10472.9
194.3	13752.8	12206.4
194.4	13753.6	15238.9
194.5	13754.4	11735.5
194.6	13755.3	10243
194.7	13756.1	11665
194.8	13756.9	11996.8
194.9	13757.7	12363
195	13758.6	13601
195.1	13759.4	13290.2
195.2	13760.2	11061.3
195.3	13761	12806.2
195.4	13761.9	10502.5
195.5	13762.7	9228.46
195.6	13763.5	19583.3
195.7	13764.3	9479.21
195.8	13765.1	9560.08
195.9	13766	10724.4
196	13766.8	9521.94
196.1	13767.6	8555.49
196.2	13768.4	9905.39
196.3	13769.3	10774.1
196.4	13770.1	9695.96
196.5	13770.9	8631.15
196.6	13771.7	10974.4
196.7	13772.6	12799.2
196.8	13773.4	10838.9
196.9	13774.2	9834.07
197	13775	10079.8
197.1	13775.9	11468.2
197.2	13776.7	10550.4
197.3	13777.5	10832.2
197.4	13778.3	12651.6
197.5	13779.1	10968.3
197.6	13780	10729.1
197.7	13780.8	10343.8
197.8	13781.6	9178
197.9	13782.4	9019.94
198	13783.3	11444.1
198.1	13784.1	10042.5
198.2	13784.9	10077.3
198.3	13785.7	11407.9
198.4	13786.5	9377.5
198.5	13787.4	8812.82
198.6	13788.2	13991.9
198.7	13789	10196
198.8	13789.9	8843.9
198.9	13790.7	10078.7
199	13791.5	8945.49
199.1	13792.3	8531.53
199.2	13793.1	10430
199.3	13794	10103.6
199.4	13794.8	9550.12
199.5	13795.6	10194.4
199.6	13796.4	10731.8
199.7	13797.3	10638.7
199.8	13798.1	9961.89
199.9	13798.9	13085.6
200	13799.7	13626.7
200.1	13800.5	12556.4
200.2	13801.4	10613.4
200.3	13802.2	11412.1
200.4	13803	11604.4
200.5	13803.9	15529.4
200.6	13804.7	12926.3
200.7	13805.5	14281.2
200.8	13806.3	11089.2
200.9	13807.1	12952.7
201	13808	12270.5
201.1	13808.8	9070.22
201.2	13809.6	10010.5
201.3	13810.4	9601.16
201.4	13811.3	9699.58
201.5	13812.1	11271.1
201.6	13812.9	8400.14
201.7	13813.7	12279.8
201.8	13814.5	8977.91
201.9	13815.4	8409.11
202	13816.2	9292.06
202.1	13817	7348.83
202.2	13817.8	8214.7
202.3	13818.7	8228.15
202.4	13819.5	9904.43
202.5	13820.3	9430.44
202.6	13821.1	8258.33
202.7	13822	9872.76
202.8	13822.8	10965.9
202.9	13823.6	15476.8
203	13824.4	13203.7
203.1	13825.2	9268.87
203.2	13826.1	8033.53
203.3	13826.9	7812.75
203.4	13827.7	11858.1
203.5	13828.5	10376.8
203.6	13829.4	8174.19
203.7	13830.2	9302.78
203.8	13831	8685.28
203.9	13831.8	10008.2
204	13832.7	8517.93
204.1	13833.5	11367.7
204.2	13834.3	9267.35
204.3	13835.1	8991.06
204.4	13836	9961.87
204.5	13836.8	8802.5
204.6	13837.6	15310.4
204.7	13838.4	13585.5
204.8	13839.2	10340.8
204.9	13840.1	9006.39
205	13840.9	10252.6
205.1	13841.7	11573.7
205.2	13842.5	9330.94
205.3	13843.4	9470.79
205.4	13844.2	10860.3
205.5	13845	8268.56
205.6	13845.8	10579.5
205.7	13846.7	10729.1
205.8	13847.5	8778.94
205.9	13848.3	9793.84
206	13849.1	9011.76
206.1	13850	9921.23
206.2	13850.8	10865.2
206.3	13851.6	11603.1
206.4	13852.4	13827.1
206.5	13853.2	8918.14
206.6	13854.1	8622.77
206.7	13854.9	9873.34
206.8	13855.7	9152.18
206.9	13856.5	9743.29
207	13857.4	9754.18
207.1	13858.2	9505.4
207.2	13859	8902.71
207.3	13859.8	8360.69
207.4	13860.7	8199.22
207.5	13861.5	8056.28
207.6	13862.3	8649.66
207.7	13863.1	8194.58
207.8	13864	9938.31
207.9	13864.8	9187.35
208	13865.6	10213.6
208.1	13866.4	10840.3
208.2	13867.2	9071.79
208.3	13868.1	8007.8
208.4	13868.9	8837.59
208.5	13869.7	9201.22
208.6	13870.5	9830.42
208.7	13871.4	12241.2
208.8	13872.2	13982.1
208.9	13873	9375.36
209	13873.8	8369.98
209.1	13874.7	9321.12
209.2	13875.5	9708.48
209.3	13876.3	12587.3
209.4	13877.1	10427.6
209.5	13878	8681.24
209.6	13878.8	8648.63
209.7	13879.6	10881.4
209.8	13880.4	10039.2
209.9	13881.2	9889.16
210	13882.1	12033.8
210.1	13882.9	12664.4
210.2	13883.7	10507.5
210.3	13884.5	11024.5
210.4	13885.4	9171.11
210.5	13886.2	11146.1
210.6	13887	11568.2
210.7	13887.8	11443.1
210.8	13888.7	9623.94
210.9	13889.5	11242.5
211	13890.3	9609.18
211.1	13891.1	9957.12
211.2	13892	10276
211.3	13892.8	10447
211.4	13893.6	9262.71
211.5	13894.4	8563.11
211.6	13895.2	8480.14
211.7	13896.1	7960.61
211.8	13896.9	9841.69
211.9	13897.7	8143.68
212	13898.5	10269.8
212.1	13899.4	7949.4
212.2	13900.2	7515.45
212.3	13901	8141.04
212.4	13901.8	7553.07
212.5	13902.6	7918.63
212.6	13903.5	8626.02
212.7	13904.3	11873.3
212.8	13905.1	10755.9
212.9	13906	13291.9
213	13906.8	12087.8
213.1	13907.6	10935.1
213.2	13908.4	11232.9
213.3	13909.2	9737.57
213.4	13910.1	10912.8
213.5	13910.9	10180.3
213.6	13911.7	11417.8
213.7	13912.5	15282.7
213.8	13913.4	9166.96
213.9	13914.2	9886.21
214	13915	10494.8
214.1	13915.8	10544.3
214.2	13916.6	10363.1
214.3	13917.5	10120.4
214.4	13918.3	14512.5
214.5	13919.1	12102.1
214.6	13920	11209
214.7	13920.8	10487.8
214.8	13921.6	11260.4
214.9	13922.4	9787.8
215	13923.2	10649.3
215.1	13924.1	10929.5
215.2	13924.9	9501.78
215.3	13925.7	13124.7
215.4	13926.5	10726.5
215.5	13927.4	8958.75
215.6	13928.2	9509.6
215.7	13929	9702.09
215.8	13929.8	10025.2
215.9	13930.6	13641
216	13931.5	8363.32
216.1	13932.3	6371.36
216.2	13933.1	5327.07
216.3	13933.9	7510.84
216.4	13934.8	7548.67
216.5	13935.6	8412.77
216.6	13936.4	6884.76
216.7	13937.2	9256.31
216.8	13938.1	9308.82
216.9	13938.9	10552.1
217	13939.7	10766.1
217.1	13940.5	9882.76
217.2	13941.4	10452
217.3	13942.2	9526.3
217.4	13943	13992.2
217.5	13943.8	10557.5
217.6	13944.6	10444.4
217.7	13945.5	9432.99
217.8	13946.3	13775.8
217.9	13947.1	9641.92
218	13947.9	10904.9
218.1	13948.8	10302.9
218.2	13949.6	10138.7
218.3	13950.4	11486.8
218.4	13951.2	13974.3
218.5	13952.1	14110.8
218.6	13952.9	10830
218.7	13953.7	11529.1
218.8	13954.5	11030.7
218.9	13955.4	12746.4
219	13956.2	10007.9
219.1	13957	11688.5
219.2	13957.8	10715.6
219.3	13958.6	10419.2
219.4	13959.5	10027.4
219.5	13960.3	9834.15
219.6	13961.1	9039.3
219.7	13961.9	9392.87
219.8	13962.8	10686.9
219.9	13963.6	9904.99
220	13964.4	9205.94
220.1	13965.2	16040.9
220.2	13966.1	9332.76
220.3	13966.9	11796.9
220.4	13967.7	12752.4
220.5	13968.5	11173.3
220.6	13969.4	12358.8
220.7	13970.2	10686
220.8	13971	10095.3
220.9	13971.8	9776.09
221	13972.6	11544
221.1	13973.5	9766.69
221.2	13974.3	11071.2
221.3	13975.1	12578.9
221.4	13975.9	15547
221.5	13976.8	11718.4
221.6	13977.6	11131
221.7	13978.4	9365.43
221.8	13979.2	10605.3
221.9	13980.1	15274.1
222	13980.9	12109.2
222.1	13981.7	9472.26
222.2	13982.5	10535
222.3	13983.4	10480.8
222.4	13984.2	12782.3
222.5	13985	9086.03
222.6	13985.8	11863.5
222.7	13986.6	11115.4
222.8	13987.5	12517.9
222.9	13988.3	9473.04
223	13989.1	10206.6
223.1	13989.9	10327.3
223.2	13990.8	12212.8
223.3	13991.6	10414.8
223.4	13992.4	11621.4
223.5	13993.2	11208.5
223.6	13994	9129.08
223.7	13994.9	10567.5
223.8	13995.7	9702.08
223.9	13996.5	9281.3
224	13997.4	10394.7
224.1	13998.2	8768.97
224.2	13999	13163.7
224.3	13999.8	10537.7
224.4	14000.6	10075.4
224.5	14001.5	9051.24
224.6	14002.3	8157.63
224.7	14003.1	8206.36
224.8	14003.9	10007.5
224.9	14004.8	9052.27
225	14005.6	9222.91
225.1	14006.4	7542.3
225.2	14007.2	8104.97
225.3	14008	8536.12
225.4	14008.9	7961.56
225.5	14009.7	9543.77
225.6	14010.5	9511.95
225.7	14011.3	8810.16
225.8	14012.2	7928.84
225.9	14013	8495.73
226	14013.8	10435.2
226.1	14014.6	10548.2
226.2	14015.5	8480.25
226.3	14016.3	7511.25
226.4	14017.1	9049.32
226.5	14017.9	15282.4
226.6	14018.8	9498.84
226.7	14019.6	7904.45
226.8	14020.4	7151.36
226.9	14021.2	8414.09
227	14022	9252.7
227.1	14022.9	7959.82
227.2	14023.7	9832.08
227.3	14024.5	9619.62
227.4	14025.3	9659.27
227.5	14026.2	7534.07
227.6	14027	9223.71
227.7	14027.8	10911.8
227.8	14028.6	7515.42
227.9	14029.5	10555.9
228	14030.3	11684.4
228.1	14031.1	10414.5
228.2	14031.9	15798.6
228.3	14032.8	15622.1
230	14046.8	12956.7
230.1	14047.6	13251
230.2	14048.4	13178.9
230.3	14049.2	13532.8
230.4	14050	12291
230.5	14050.9	11216.7
230.6	14051.7	11164.2
230.7	14052.5	13525
230.8	14053.3	11966.8
230.9	14054.2	11710.2
231	14055	14064.2
231.1	14055.8	13856.6
231.2	14056.6	9654.22
231.3	14057.5	7046.94
231.4	14058.3	10028.2
231.5	14059.1	10101
231.6	14059.9	11956
231.7	14060.8	11449.1
231.8	14061.6	10048.1
231.9	14062.4	14206.6
232	14063.2	19166.4
232.1	14064	13953.3
232.2	14064.9	10807.3
232.3	14065.7	16362.5
232.4	14066.5	11242.5
232.5	14067.3	11851.3
232.6	14068.2	8371.93
232.7	14069	8587.66
232.8	14069.8	8529.46
232.9	14070.6	9208.68
233	14071.5	7730.57
233.1	14072.3	9981.45
233.2	14073.1	10213
233.3	14073.9	10969.9
233.4	14074.8	10215.5
233.5	14075.6	7716.85
233.6	14076.4	8331.18
233.7	14077.2	10947.5
233.8	14078	10257.9
233.9	14078.9	8859
234	14079.7	9158.48
234.1	14080.5	11712.7
234.2	14081.3	7463.75
234.3	14082.2	10544.7
234.4	14083	7917.38
234.5	14083.8	9059.08
234.6	14084.6	9816.42
234.7	14085.5	9500.05
234.8	14086.3	11185.2
234.9	14087.1	9636.94
235	14087.9	13661.1
235.1	14088.8	9230.38
235.2	14089.6	11257.8
235.3	14090.4	11864.4
235.4	14091.2	8234.74
235.5	14092	9714.19
235.6	14092.9	9377.58
235.7	14093.7	9305.37
235.8	14094.5	12357.4
235.9	14095.3	12225.7
236	14096.2	11953.1
236.1	14097	9737.46
236.2	14097.8	11612.1
236.3	14098.6	7786.98
236.4	14099.5	8084.5
236.5	14100.3	10057.9
236.6	14101.1	11088.6
236.7	14101.9	14183.6
236.8	14102.7	9091.99
236.9	14103.6	8619.18
237	14104.4	10962.3
237.1	14105.2	9664.22
237.2	14106	11133.4
237.3	14106.9	11675.7
237.4	14107.7	11104.2
237.5	14108.5	13552.6
237.6	14109.3	11444.5
237.7	14110.1	11015.7
237.8	14111	11170.4
237.9	14111.8	11702.3
238	14112.6	12117.2
238.1	14113.5	10635.9
238.2	14114.3	11241.1
238.3	14115.1	12435.5
238.4	14115.9	11729.6
238.5	14116.7	10816.8
238.6	14117.6	11416
238.7	14118.4	11289.1
238.8	14119.2	11843.7
238.9	14120	10856.5
239	14120.9	13724.6
239.1	14121.7	10651.9
239.2	14122.5	10878
239.3	14123.3	10358.5
239.4	14124.1	10741.4
239.5	14125	14795
239.6	14125.8	11479.1
239.7	14126.6	12144.4
239.8	14127.5	12235.2
239.9	14128.3	11570.2
240	14129.1	12208.2
240.1	14129.9	11057.1
240.2	14130.7	11765.9
240.3	14131.6	11735.3
240.4	14132.4	11326.8
240.5	14133.2	13688.8
240.6	14134	12807.3
240.7	14134.9	13390.6
240.8	14135.7	11521.6
240.9	14136.5	11271.5
241	14137.3	11620.5
241.1	14138.1	11737.9
241.2	14139	13484.4
241.3	14139.8	12407
241.4	14140.6	12170.8
241.5	14141.4	12172.6
241.6	14142.3	11733.1
241.7	14143.1	11316.8
241.8	14143.9	12837.6
241.9	14144.7	10972.8
242	14145.6	11616.1
242.1	14146.4	12067.5
242.2	14147.2	11072.9
242.3	14148	10908.6
242.4	14148.9	12891.7
242.5	14149.7	11642.8
242.6	14150.5	11038.3
242.7	14151.3	10471.9
242.8	14152.1	11158.5
242.9	14153	12169.1
243	14153.8	11967.3
243.1	14154.6	11576.5
243.2	14155.4	11350.2
243.3	14156.3	10574.3
243.4	14157.1	11744.4
243.5	14157.9	11084.5
243.6	14158.7	13747.9
243.7	14159.6	13351
243.8	14160.4	12867.6
243.9	14161.2	12626.3
244	14162	11560.1
244.1	14162.9	11453
244.2	14163.7	10747.5
244.3	14164.5	13323.9
244.4	14165.3	12877.8
244.5	14166.1	11153.8
244.6	14167	11034.7
244.7	14167.8	11064.5
244.8	14168.6	11787.9
244.9	14169.4	12413.9
245	14170.3	11081.6
245.1	14171.1	13965.1
245.2	14171.9	13482.8
245.3	14172.7	11904.2
245.4	14173.6	11812.2
245.5	14174.4	11440.4
245.6	14175.2	15063.4
245.7	14176	11863.8
245.8	14176.9	11293.7
245.9	14177.7	12277.9
246	14178.5	12491.2
246.1	14179.3	11054.6
246.2	14180.1	13047.2
246.3	14181	12161.3
246.4	14181.8	11496.5
[truncated: 2,484 more rows]

## Sheet: Pisco Ti-XRF Raw
Depth	Age	Ti (counts)
10	13587.4	765
10.1	13588.8	706
10.2	13590.2	708
10.3	13591.6	576
10.4	13593.1	556
10.5	13594.5	603
10.6	13595.9	594
10.7	13597.3	589
10.8	13598.8	528
10.9	13600.2	557
11	13601.6	733
11.1	13603.1	733
11.2	13604.5	639
11.3	13605.9	660
11.4	13607.3	554
11.5	13608.8	532
11.6	13610.2	620
11.7	13611.6	619
11.8	13613	713
11.9	13614.5	703
12	13615.9	652
12.1	13617.3	654
12.2	13618.7	717
12.3	13620.2	670
12.4	13621.6	652
12.5	13623	689
12.6	13624.4	636
12.7	13625.9	648
12.8	13627.3	691
12.9	13628.7	732
13	13630.1	711
13.1	13631.6	676
13.2	13633	685
13.3	13634.4	645
13.4	13635.8	645
13.5	13637.3	659
13.6	13638.7	699
13.7	13640.1	793
13.8	13641.6	676
13.9	13643	688
14	13644.4	695
14.1	13645.8	612
14.2	13647.3	706
14.3	13648.7	782
14.4	13650.1	817
14.5	13651.5	682
14.6	13653	804
14.7	13654.4	546
14.8	13655.8	680
14.9	13657.2	696
15	13658.7	757
15.1	13660.1	759
15.2	13661.5	720
15.3	13662.9	694
15.4	13664.4	589
15.5	13665.8	863
15.6	13667.2	805
15.7	13668.6	705
15.8	13670.1	722
15.9	13671.5	642
16	13672.9	614
16.1	13674.3	557
16.2	13675.8	625
16.3	13677.2	556
16.4	13678.6	602
16.5	13680	539
16.6	13681.5	552
16.7	13682.9	671
16.8	13684.3	614
16.9	13685.8	630
17	13687.2	608
17.1	13688.6	641
17.2	13690	607
17.3	13691.5	710
17.4	13692.9	627
17.5	13694.3	573
17.6	13695.7	735
17.7	13697.2	733
17.8	13698.6	696
17.9	13700	631
18	13701.4	499
18.1	13702.9	620
18.2	13704.3	684
18.3	13705.7	636
18.4	13707.1	621
18.5	13708.6	650
18.6	13710	658
18.7	13711.4	571
18.8	13712.8	592
18.9	13714.3	596
19	13715.7	612
19.1	13717.1	679
19.2	13718.5	594
19.3	13720	627
19.4	13721.4	503
19.5	13722.8	607
19.6	13724.3	640
19.7	13725.7	669
19.8	13727.1	688
19.9	13728.5	597
20	13730	667
20.1	13731.4	658
20.2	13732.8	656
20.3	13734.2	586
20.4	13735.7	558
20.5	13737.1	541
20.6	13738.5	689
20.7	13739.9	576
20.8	13741.4	604
20.9	13742.8	564
21	13744.2	531
21.1	13745.6	554
21.2	13747.1	641
21.3	13748.5	674
21.4	13749.9	587
21.5	13751.3	696
21.6	13752.8	654
21.7	13754.2	561
21.8	13755.6	682
21.9	13757	645
22	13758.5	575
22.1	13759.9	716
22.2	13761.3	699
22.3	13762.8	623
22.4	13764.2	658
22.5	13765.6	632
22.6	13767	710
22.7	13768.5	707
22.8	13769.9	618
22.9	13771.3	635
23	13772.7	583
23.1	13774.2	521
23.2	13775.6	847
23.3	13777	659
23.4	13778.4	712
23.5	13779.9	690
23.6	13781.3	689
23.7	13782.7	746
23.8	13784.1	598
23.9	13785.6	627
24	13787	724
24.1	13788.4	657
24.2	13789.8	934
24.3	13791.3	719
24.4	13792.7	591
24.5	13794.1	573
24.6	13795.5	603
24.7	13797	605
24.8	13798.4	533
24.9	13799.8	589
25	13801.3	710
25.1	13802.7	754
25.2	13804.1	698
25.3	13805.5	788
25.4	13807	771
25.5	13808.4	768
25.6	13809.8	792
25.7	13811.2	705
25.8	13812.7	690
25.9	13814.1	769
26	13815.5	807
26.1	13816.9	628
26.2	13818.4	907
26.3	13819.8	716
26.4	13821.2	730
26.5	13822.6	690
27	13829.8	911
27.1	13831.2	756
27.2	13832.6	769
27.3	13834	751
27.4	13835.5	738
27.5	13836.9	760
27.6	13838.3	767
27.7	13839.8	715
27.8	13841.2	742
27.9	13842.6	649
28	13844	680
28.1	13845.5	630
28.2	13846.9	681
28.3	13848.3	785
28.4	13849.7	574
28.5	13851.2	567
28.6	13852.6	499
28.7	13854	664
28.8	13855.4	685
28.9	13856.9	634
29	13858.3	669
29.1	13859.7	698
29.2	13861.1	581
29.3	13862.6	579
29.4	13864	619
29.5	13865.4	617
29.6	13866.8	531
29.7	13868.3	715
29.8	13869.7	625
29.9	13871.1	603
30	13872.5	621
30.1	13874	637
30.2	13875.4	571
30.3	13876.8	562
30.4	13878.2	697
30.5	13879.7	694
30.6	13881.1	677
30.7	13882.5	666
30.8	13884	613
30.9	13885.4	558
31	13886.8	564
31.1	13888.2	704
31.2	13889.7	666
31.3	13891.1	737
31.4	13892.5	703
31.5	13893.9	682
31.6	13895.4	512
31.7	13896.8	612
31.8	13898.2	666
31.9	13899.6	608
32	13901.1	617
32.1	13902.5	668
32.2	13903.9	553
32.3	13905.3	626
32.4	13906.8	681
32.5	13908.2	720
32.6	13909.6	593
32.7	13911	669
32.8	13912.5	701
32.9	13913.9	684
33	13915.3	634
33.1	13916.7	677
33.2	13918.2	645
33.3	13919.6	700
33.4	13921	698
33.5	13922.5	642
33.6	13923.9	484
33.7	13925.3	669
33.8	13926.7	682
33.9	13928.2	689
34	13929.6	683
34.1	13931	668
34.2	13932.4	641
34.3	13933.9	570
34.4	13935.3	716
34.5	13936.7	691
34.6	13938.1	593
34.7	13939.6	716
34.8	13941	744
34.9	13942.4	596
35	13943.8	614
35.1	13945.3	636
35.2	13946.7	701
35.3	13948.1	639
35.4	13949.5	698
35.5	13951	604
35.6	13952.4	702
35.7	13953.8	580
35.8	13955.2	718
35.9	13956.7	617
36	13958.1	646
36.1	13959.5	723
36.2	13961	680
36.3	13962.4	649
36.4	13963.8	599
36.5	13965.2	663
36.6	13966.7	620
36.7	13968.1	635
36.8	13969.5	414
36.9	13970.9	523
37	13972.4	566
37.1	13973.8	529
37.2	13975.2	703
37.3	13976.6	651
37.4	13978.1	574
37.5	13979.5	611
37.6	13980.9	594
37.7	13982.3	619
37.8	13983.8	557
37.9	13985.2	556
38	13986.6	715
38.1	13988	581
38.2	13989.5	588
38.3	13990.9	560
38.4	13992.3	606
38.5	13993.7	585
38.6	13995.2	618
38.7	13996.6	592
38.8	13998	579
38.9	13999.5	546
39	14000.9	578
39.1	14002.3	508
39.2	14003.7	449
39.3	14005.2	705
39.4	14006.6	632
39.5	14008	569
39.6	14009.4	598
39.7	14010.9	740
39.8	14012.3	753
39.9	14013.7	779
40	14015.1	767
40.1	14016.6	813
40.2	14018	840
40.3	14019.4	686
40.4	14020.8	709
40.5	14022.3	763
40.6	14023.7	697
40.7	14025.1	788
40.8	14026.5	736
40.9	14028	752
41	14029.4	779
41.1	14030.8	648
41.2	14032.2	630
41.3	14033.7	647
41.4	14035.1	716
41.5	14036.5	661
41.6	14038	817
41.7	14039.4	712
41.8	14040.8	670
41.9	14042.2	673
42	14043.7	725
42.1	14045.1	703
42.2	14046.5	725
42.3	14047.9	724
42.4	14049.4	724
42.5	14050.8	677
42.6	14052.2	661
42.7	14053.6	737
42.8	14055.1	697
42.9	14056.5	688
43	14057.9	706
43.1	14059.3	757
43.2	14060.8	648
43.3	14062.2	656
43.4	14063.6	618
43.5	14065	717
43.6	14066.5	575
43.7	14067.9	710
43.8	14069.3	649
43.9	14070.7	766
44	14072.2	652
44.1	14073.6	693
44.2	14075	664
44.3	14076.4	799
44.4	14077.9	741
44.5	14079.3	705
44.6	14080.7	766
44.7	14082.2	733
44.8	14083.6	870
44.9	14085	749
45	14086.4	687
45.1	14087.9	762
45.2	14089.3	755
45.3	14090.7	793
45.4	14092.1	695
45.5	14093.6	730
45.6	14095	760
45.7	14096.4	692
45.8	14097.8	596
45.9	14099.3	619
46	14100.7	767
46.1	14102.1	701
46.2	14103.5	503
46.3	14105	599
46.4	14106.4	631
46.5	14107.8	784
46.6	14109.2	619
46.7	14110.7	671
46.8	14112.1	679
46.9	14113.5	719
47	14114.9	766
47.1	14116.4	875
47.2	14117.8	705
47.3	14119.2	757
47.4	14120.7	682
47.5	14122.1	764
47.6	14123.5	667
47.7	14124.9	789
47.8	14126.4	771
47.9	14127.8	810
48	14129.2	748
48.1	14130.6	719
48.2	14132.1	695
48.3	14133.5	782
48.4	14134.9	750
48.5	14136.3	772
48.6	14137.8	821
48.7	14139.2	621
48.8	14140.6	649
48.9	14142	696
49	14143.5	703
49.1	14144.9	772
49.2	14146.3	785
49.3	14147.7	699
49.4	14149.2	736
49.5	14150.6	750
49.6	14152	685
49.7	14153.4	644
49.8	14154.9	780
49.9	14156.3	794
50	14157.7	742
50.1	14159.2	791
50.2	14160.6	721
50.3	14162	783
50.4	14163.4	663
50.5	14164.9	842
50.6	14166.3	739
50.7	14167.7	753
50.8	14169.1	723
50.9	14170.6	710
51	14172	644
51.1	14173.4	685
51.2	14174.8	611
51.3	14176.3	666
51.4	14177.7	681
51.5	14179.1	704
51.6	14180.5	738
51.7	14182	668
51.8	14183.4	722
51.9	14184.8	630
52	14186.2	679
52.1	14187.7	664
52.2	14189.1	616
52.3	14190.5	686
52.4	14191.9	614
52.5	14193.4	711
52.6	14194.8	706
52.7	14196.2	587
52.8	14197.7	727
52.9	14199.1	715
53	14200.5	762
53.1	14201.9	737
53.2	14203.4	756
53.3	14204.8	682
53.4	14206.2	715
53.5	14207.6	689
53.6	14209.1	680
53.7	14210.5	703
53.8	14211.9	707
53.9	14213.3	585
54	14214.8	758
54.1	14216.2	681
54.2	14217.6	643
54.3	14219	704
54.4	14220.5	751
54.5	14221.9	716
54.6	14223.3	639
54.7	14224.7	519
54.8	14226.2	457
54.9	14227.6	433
55	14229	646
55.1	14230.4	593
55.2	14231.9	725
55.3	14233.3	509
55.4	14234.7	571
55.5	14236.2	542
55.6	14237.6	588
55.7	14239	611
55.8	14240.4	616
55.9	14241.9	731
56	14243.3	727
56.1	14244.7	691
56.2	14246.1	730
56.3	14247.6	737
56.4	14249	750
56.5	14250.4	688
56.6	14251.8	658
56.7	14253.3	764
56.8	14254.7	787
56.9	14256.1	691
57	14257.5	670
57.1	14259	549
57.2	14260.4	663
57.3	14261.8	698
57.4	14263.2	571
57.5	14264.7	680
57.6	14266.1	712
57.7	14267.5	595
57.8	14268.9	747
57.9	14270.4	775
58	14271.8	684
58.1	14273.2	623
58.2	14274.6	646
58.3	14276.1	723
58.4	14277.5	614
58.5	14278.9	726
58.6	14280.4	644
58.7	14281.8	705
58.8	14283.2	692
58.9	14284.6	666
59	14286.1	751
59.1	14287.5	750
59.2	14288.9	800
59.3	14290.3	737
59.4	14291.8	804
59.5	14293.2	778
59.6	14294.6	574
59.7	14296	727
59.8	14297.5	854
59.9	14298.9	765
60	14300.3	741
60.1	14301.7	727
60.2	14303.2	813
60.3	14304.6	730
60.4	14306	823
60.5	14307.4	815
60.6	14308.9	812
60.7	14310.3	725
60.8	14311.7	783
60.9	14313.1	721
61	14314.6	743
61.1	14316	726
61.2	14317.4	693
61.3	14318.9	649
61.4	14320.3	697
61.5	14321.7	815
61.6	14323.1	732
61.7	14324.6	720
61.8	14326	666
61.9	14327.4	715
62	14328.8	702
62.1	14330.3	821
62.2	14331.7	887
62.3	14333.1	875
62.4	14334.5	805
62.5	14336	771
62.6	14337.4	760
62.7	14338.8	778
62.8	14340.2	838
62.9	14341.7	847
63	14343.1	738
63.1	14344.5	752
63.2	14345.9	844
63.3	14347.4	811
63.4	14348.8	831
63.5	14350.2	802
63.6	14351.6	880
63.7	14353.1	697
63.8	14354.5	721
63.9	14355.9	775
64	14357.4	600
64.1	14358.8	782
64.2	14360.2	699
64.3	14361.6	774
64.4	14363.1	714
64.5	14364.5	711
64.6	14365.9	696
64.7	14367.3	825
64.8	14368.8	685
64.9	14370.2	671
65	14371.6	787
65.1	14373	687
65.2	14374.5	758
65.3	14375.9	757
65.4	14377.3	673
65.5	14378.7	716
65.6	14380.2	728
65.7	14381.6	735
65.8	14383	738
65.9	14384.4	802
66	14385.9	707
66.1	14387.3	757
66.2	14388.7	727
66.3	14390.1	675
66.4	14391.6	635
66.5	14393	643
66.6	14394.4	711
66.7	14395.9	826
66.8	14397.3	766
66.9	14398.7	703
67	14400.1	779
67.1	14401.6	621
67.2	14403	832
67.3	14404.4	625
67.4	14405.8	811
67.5	14407.3	677
67.6	14408.7	728
67.7	14410.1	642
67.8	14411.5	709
67.9	14413	769
68	14414.4	820
68.1	14415.8	740
68.2	14417.2	808
68.3	14418.7	775
68.4	14420.1	766
68.5	14421.5	720
68.6	14422.9	736
68.7	14424.4	741
68.8	14425.8	823
68.9	14427.2	718
69	14428.6	748
69.1	14430.1	857
69.2	14431.5	877
69.3	14432.9	869
69.4	14434.4	798
69.5	14435.8	754
69.6	14437.2	845
69.7	14438.6	853
69.8	14440.1	757
69.9	14441.5	742
70	14442.9	685
70.1	14444.3	757
70.2	14445.8	667
70.3	14447.2	793
70.4	14448.6	834
70.5	14450	736
70.6	14451.5	741
70.7	14452.9	703
70.8	14454.3	662
70.9	14455.7	638
71	14457.2	623
71.1	14458.6	670
71.2	14460	585
71.3	14461.4	772
71.4	14462.9	732
71.5	14464.3	723
71.6	14465.7	617
71.7	14467.1	657
71.8	14468.6	543
71.9	14470	511
72	14471.4	607
72.1	14472.8	677
72.2	14474.3	678
72.3	14475.7	756
72.4	14477.1	612
72.5	14478.6	669
72.6	14480	649
72.7	14481.4	736
72.8	14482.8	679
72.9	14484.3	624
73	14485.7	748
73.1	14487.1	733
73.2	14488.5	748
73.3	14490	618
73.4	14491.4	622
73.5	14492.8	793
73.6	14494.2	692
73.7	14495.7	755
73.8	14497.1	761
73.9	14498.5	684
74	14499.9	589
74.1	14501.4	677
74.2	14502.8	684
74.3	14504.2	685
74.4	14505.6	782
74.5	14507.1	822
74.6	14508.5	932
74.7	14509.9	824
74.8	14511.3	852
74.9	14512.8	764
75	14514.2	735
75.1	14515.6	835
75.2	14517.1	854
75.3	14518.5	647
75.4	14519.9	661
75.5	14521.3	740
75.6	14522.8	565
75.7	14524.2	775
75.8	14525.6	828
75.9	14527	750
76	14528.5	776
76.1	14529.9	708
76.2	14531.3	841
76.3	14532.7	727
76.4	14534.2	674
76.5	14535.6	664
76.6	14537	712
76.7	14538.4	664
76.8	14539.9	635
76.9	14541.3	789
77	14542.7	829
77.1	14544.1	638
77.2	14545.6	665
77.3	14547	609
77.4	14548.4	701
77.5	14549.8	683
77.6	14551.3	659
77.7	14552.7	622
77.8	14554.1	768
77.9	14555.6	608
78	14557	793
78.1	14558.4	737
78.2	14559.8	616
78.3	14561.3	548
78.4	14562.7	741
78.5	14564.1	751
78.6	14565.5	694
78.7	14567	731
78.8	14568.4	734
78.9	14569.8	721
79	14571.2	762
79.1	14572.7	646
79.2	14574.1	650
79.3	14575.5	712
79.4	14576.9	734
79.5	14578.4	557
79.6	14579.8	782
79.7	14581.2	572
79.8	14582.6	589
79.9	14584.1	687
80	14585.5	817
80.1	14586.9	825
80.2	14588.3	752
80.3	14589.8	778
80.4	14591.2	739
80.5	14592.6	772
80.6	14594.1	864
80.7	14595.5	897
80.8	14596.9	793
80.9	14598.3	790
81	14599.8	873
81.1	14601.2	853
81.2	14602.6	979
81.3	14604	862
81.4	14605.5	805
81.5	14606.9	803
81.6	14608.3	715
81.7	14609.7	810
81.8	14611.2	741
81.9	14612.6	781
82	14614	766
82.1	14615.4	665
82.2	14616.9	732
82.3	14618.3	709
82.4	14619.7	677
82.5	14621.1	846
82.6	14622.6	693
82.7	14624	680
82.8	14625.4	560
82.9	14626.8	671
83	14628.3	652
83.1	14629.7	646
83.2	14631.1	682
83.3	14632.6	747
83.4	14634	686
83.5	14635.4	724
83.6	14636.8	723
83.7	14638.3	778
83.8	14639.7	706
83.9	14641.1	549
84	14642.5	546
84.1	14644	579
84.2	14645.4	655
84.3	14646.8	779
84.4	14648.2	728
84.5	14649.7	717
84.6	14651.1	733
84.7	14652.5	695
84.8	14653.9	724
84.9	14655.4	673
85	14656.8	895
85.1	14658.2	785
85.2	14659.6	699
85.3	14661.1	675
85.4	14662.5	698
85.5	14663.9	734
85.6	14665.3	764
85.7	14666.8	855
85.8	14668.2	746
85.9	14669.6	857
86	14671.1	745
86.1	14672.5	735
86.2	14673.9	812
86.3	14675.3	795
86.4	14676.8	773
86.5	14678.2	853
86.6	14679.6	799
86.7	14681	704
86.8	14682.5	771
86.9	14683.9	751
87	14685.3	732
87.1	14686.7	735
87.2	14688.2	735
87.3	14689.6	829
87.4	14691	659
87.5	14692.4	706
87.6	14693.9	637
87.7	14695.3	546
87.8	14696.7	665
87.9	14698.1	696
88	14699.6	626
88.1	14701	634
88.2	14702.4	736
88.3	14703.8	716
88.4	14705.3	678
88.5	14706.7	782
88.6	14708.1	584
88.7	14709.5	614
88.8	14711	625
88.9	14712.4	717
89	14713.8	638
89.1	14715.3	633
89.2	14716.7	662
89.3	14718.1	589
89.4	14719.5	678
89.5	14721	752
89.6	14722.4	671
89.7	14723.8	618
89.8	14725.2	458
89.9	14726.7	374
90	14728.1	364
90.1	14729.5	471
90.2	14730.9	587
90.3	14732.4	553
90.4	14733.8	631
90.5	14735.2	545
90.6	14736.6	621
90.7	14738.1	697
90.8	14739.5	604
90.9	14740.9	600
91	14742.3	700
91.1	14743.8	756
91.2	14745.2	806
91.3	14746.6	700
91.4	14748	576
91.5	14749.5	597
91.6	14750.9	651
91.7	14752.3	550
91.8	14753.8	648
91.9	14755.2	524
92	14756.6	579
92.1	14758	527
92.2	14759.5	498
92.3	14760.9	580
92.4	14762.3	574
92.5	14763.7	494
92.6	14765.2	476
92.7	14766.6	387
92.8	14768	392
92.9	14769.4	478
93	14770.9	472
93.1	14772.3	526
93.2	14773.7	537
93.3	14775.1	451
93.4	14776.6	499
93.5	14778	484
93.6	14779.4	419
93.7	14780.8	543
93.8	14782.3	429
93.9	14783.7	661
94	14785.1	554
94.1	14786.5	552
94.2	14788	555
94.3	14789.4	506
94.4	14790.8	691
94.5	14792.3	453
94.6	14793.7	518
94.7	14795.1	549
94.8	14796.5	507
94.9	14798	570
95	14799.4	534
95.1	14800.8	610
95.2	14802.2	629
95.3	14803.7	734
95.4	14805.1	597
95.5	14806.5	566
95.6	14807.9	618
95.7	14809.4	703
95.8	14810.8	765
95.9	14812.2	643
96	14813.6	625
96.1	14815.1	608
96.2	14816.5	533
96.3	14817.9	556
96.4	14819.3	547
96.5	14820.8	656
96.6	14822.2	676
96.7	14823.6	580
96.8	14825	678
96.9	14826.5	649
97	14827.9	621
97.1	14829.3	571
97.2	14830.8	579
97.3	14832.2	779
97.4	14833.6	675
97.5	14835	673
97.6	14836.5	694
97.7	14837.9	692
97.8	14839.3	756
97.9	14840.7	746
98	14842.2	687
98.1	14843.6	662
98.2	14845	763
98.3	14846.4	611
98.4	14847.9	586
98.5	14849.3	566
98.6	14850.7	674
98.7	14852.1	575
98.8	14853.6	599
98.9	14855	635
99	14856.4	557
99.1	14857.8	468
99.2	14859.3	574
99.3	14860.7	569
99.4	14862.1	529
99.5	14863.5	543
99.6	14865	569
99.7	14866.4	605
99.8	14867.8	541
99.9	14869.3	521
100	14870.7	635
100.1	14872.1	506
100.2	14873.5	491
100.3	14875	607
100.4	14876.4	541
100.5	14877.8	533
100.6	14879.2	588
100.7	14880.7	660
100.8	14882.1	613
100.9	14883.5	546
101	14884.9	632
101.1	14886.4	634
101.2	14887.8	575
101.3	14889.2	634
101.4	14890.6	651
101.5	14892.1	587
101.6	14893.5	531
101.7	14894.9	612
101.8	14896.3	577
101.9	14897.8	592
102	14899.2	624
102.1	14900.6	565
102.2	14902	554
102.3	14903.5	583
102.4	14904.9	453
102.5	14906.3	607
102.6	14907.7	444
102.7	14909.2	505
102.8	14910.6	450
102.9	14912	489
103	14913.5	517
103.1	14914.9	541
103.2	14916.3	510
103.3	14917.7	537
103.4	14919.2	577
103.5	14920.6	654
103.6	14922	542
103.7	14923.4	528
103.8	14924.9	556
103.9	14926.3	402
104	14927.7	624
104.1	14929.1	407
104.2	14930.6	614
104.3	14932	555
104.4	14933.4	522
104.5	14934.8	548
104.6	14936.3	483
104.7	14937.7	544
104.8	14939.1	347
104.9	14940.5	191
105	14942	352
105.1	14943.4	301
105.2	14944.8	380
105.3	14946.2	265
105.4	14947.7	253
105.5	14949.1	187
105.6	14950.5	293
105.7	14952	309
105.8	14953.4	400
105.9	14954.8	387
106	14956.2	395
106.1	14957.7	537
106.2	14959.1	527
106.3	14960.5	394
106.4	14961.9	463
106.5	14963.4	386
106.6	14964.8	272
106.7	14966.2	325
106.8	14967.6	264
106.9	14969.1	404
107	14970.5	314
107.1	14971.9	372
107.2	14973.3	457
107.3	14974.8	275
107.4	14976.2	262
107.5	14977.6	285
107.6	14979	274
107.7	14980.5	312
107.8	14981.9	361
107.9	14983.3	286
108	14984.7	375
108.1	14986.2	379
108.2	14987.6	490
108.3	14989	387
108.4	14990.5	359
108.5	14991.9	322
108.6	14993.3	453
108.7	14994.7	400
108.8	14996.2	529
108.9	14997.6	438
109	14999	521
109.1	15000.4	410
109.2	15001.9	562
109.3	15003.3	506
109.4	15004.7	585
109.5	15006.1	407
109.6	15007.6	431
109.7	15009	463
109.8	15010.4	505
109.9	15011.8	508
110	15013.3	660
110.1	15014.7	642
110.2	15016.1	626
110.3	15017.5	636
110.4	15019	480
110.5	15020.4	561
110.6	15021.8	625
110.7	15023.2	498
110.8	15024.7	514
110.9	15026.1	682
111	15027.5	555
111.1	15029	563
111.2	15030.4	555
111.3	15031.8	738
111.4	15033.2	594
111.5	15034.7	578
111.6	15036.1	607
111.7	15037.5	481
111.8	15038.9	571
111.9	15040.4	327
112	15041.8	498
112.1	15043.2	465
112.2	15044.6	505
112.3	15046.1	518
112.4	15047.5	442
112.5	15048.9	535
112.6	15050.3	520
112.7	15051.8	613
112.8	15053.2	580
112.9	15054.6	611
113	15056	710
113.1	15057.5	514
113.2	15058.9	576
113.3	15060.3	519
113.4	15061.7	549
113.5	15063.2	406
113.6	15064.6	472
113.7	15066	458
113.8	15067.5	555
113.9	15068.9	466
114	15070.3	467
114.1	15071.7	400
114.2	15073.2	592
114.3	15074.6	505
114.4	15076	620
114.5	15077.4	642
114.6	15078.9	661
114.7	15080.3	662
114.8	15081.7	605
114.9	15083.1	579
115	15084.6	741
115.1	15086	690
115.2	15087.4	705
115.3	15088.8	657
115.4	15090.3	709
115.5	15091.7	673
115.6	15093.1	541
115.7	15094.5	618
115.8	15096	539
115.9	15097.4	560
116	15098.8	501
116.1	15100.2	527
116.2	15101.7	553
116.3	15103.1	639
116.4	15104.5	639
116.5	15105.9	549
116.6	15107.4	522
116.7	15108.8	561
116.8	15110.2	518
116.9	15111.7	519
117	15113.1	437
117.1	15114.5	373
117.2	15115.9	409
117.3	15117.4	337
117.4	15118.8	274
117.5	15120.2	356
117.6	15121.6	504
117.7	15123.1	455
117.8	15124.5	464
117.9	15125.9	421
118	15127.3	458
118.1	15128.8	387
118.2	15130.2	460
118.3	15131.6	672
118.4	15133	619
118.5	15134.5	584
118.6	15135.9	549
118.7	15137.3	587
118.8	15138.7	797
118.9	15140.2	617
119	15141.6	639
119.1	15143	676
119.2	15144.4	596
119.3	15145.9	718
119.4	15147.3	697
119.5	15148.7	539
119.6	15150.2	667
119.7	15151.6	741
119.8	15153	633
119.9	15154.4	713
120	15155.9	612
120.1	15157.3	631
120.2	15158.7	699
120.3	15160.1	661
120.4	15161.6	589
120.5	15163	659
120.6	15164.4	659
120.7	15165.8	595
120.8	15167.3	557
120.9	15168.7	716
121	15170.1	642
121.1	15171.5	653
121.2	15173	519
121.3	15174.4	618
121.4	15175.8	578
121.5	15177.2	571
121.6	15178.7	591
121.7	15180.1	645
121.8	15181.5	644
121.9	15182.9	551
122	15184.4	498
122.1	15185.8	521
122.2	15187.2	452
122.3	15188.7	634
122.4	15190.1	653
122.5	15191.5	528
122.6	15192.9	581
122.7	15194.4	590
122.8	15195.8	606
122.9	15197.2	626
123	15198.6	565
123.1	15200.1	707
123.2	15201.5	701
123.3	15202.9	699
123.4	15204.3	707
123.5	15205.8	773
123.6	15207.2	753
123.7	15208.6	675
123.8	15210	755
123.9	15211.5	718
124	15212.9	661
124.1	15214.3	737
124.2	15215.7	540
124.3	15217.2	674
124.4	15218.6	670
124.5	15220	668
124.6	15221.4	676
124.7	15222.9	620
124.8	15224.3	675
124.9	15225.7	672
125	15227.2	698
125.5	15234.3	459
125.6	15235.7	568
125.7	15237.1	602
125.8	15238.6	609
125.9	15240	596
126	15241.4	540
126.1	15242.8	680
126.2	15244.3	532
126.3	15245.7	592
126.4	15247.1	708
126.5	15248.5	673
126.6	15250	737
126.7	15251.4	690
126.8	15252.8	677
126.9	15254.2	673
127	15255.7	605
127.1	15257.1	714
127.2	15258.5	837
127.3	15259.9	803
127.4	15261.4	759
127.5	15262.8	685
127.6	15264.2	664
127.7	15265.7	662
127.8	15267.1	635
127.9	15268.5	657
128	15269.9	606
128.1	15271.4	649
128.2	15272.8	687
128.3	15274.2	614
128.4	15275.6	667
128.5	15277.1	702
128.6	15278.5	622
128.7	15279.9	704
128.8	15281.3	681
128.9	15282.8	655
129	15284.2	600
129.1	15285.6	557
129.2	15287	684
129.3	15288.5	587
129.4	15289.9	585
129.5	15291.3	590
129.6	15292.7	668
129.7	15294.2	537
129.8	15295.6	570
129.9	15297	617
130	15298.4	469
130.1	15299.9	604
130.2	15301.3	573
130.3	15302.7	522
130.4	15304.1	549
130.5	15305.6	542
130.6	15307	583
130.7	15308.4	513
130.8	15309.9	587
130.9	15311.3	607
131	15312.7	627
131.1	15314.1	684
131.2	15315.6	740
131.3	15317	681
131.4	15318.4	560
131.5	15319.8	623
131.6	15321.3	535
131.7	15322.7	736
131.8	15324.1	688
131.9	15325.5	659
132	15327	601
132.1	15328.4	646
132.2	15329.8	676
132.3	15331.2	601
132.4	15332.7	702
132.5	15334.1	625
132.6	15335.5	636
132.7	15336.9	672
132.8	15338.4	661
132.9	15339.8	667
133	15341.2	735
133.1	15342.6	830
133.2	15344.1	653
133.3	15345.5	778
133.4	15346.9	746
133.5	15348.4	702
133.6	15349.8	819
133.7	15351.2	718
133.8	15352.6	723
133.9	15354.1	692
134	15355.5	632
134.1	15356.9	666
134.2	15358.3	635
134.3	15359.8	716
134.4	15361.2	665
134.5	15362.6	595
134.6	15364	500
134.7	15365.5	597
134.8	15366.9	636
134.9	15368.3	630
135	15369.7	711
135.1	15371.2	739
135.2	15372.6	656
135.3	15374	686
135.4	15375.4	629
135.5	15376.9	688
135.6	15378.3	593
135.7	15379.7	618
135.8	15381.1	643
135.9	15382.6	670
136	15384	661
136.1	15385.4	663
136.2	15386.9	681
136.3	15388.3	665
136.4	15389.7	549
136.5	15391.1	668
136.6	15392.6	666
136.7	15394	682
136.8	15395.4	552
136.9	15396.8	700
137	15398.3	529
137.1	15399.7	635
137.2	15401.1	572
137.3	15402.5	534
137.4	15404	524
137.5	15405.4	495
137.6	15406.8	565
137.7	15408.2	554
137.8	15409.7	647
137.9	15411.1	641
138	15412.5	625
138.1	15413.9	597
138.2	15415.4	608
138.3	15416.8	785
138.4	15418.2	703
138.5	15419.6	695
138.6	15421.1	696
138.7	15422.5	656
138.8	15423.9	656
138.9	15425.4	717
139	15426.8	700
139.1	15428.2	653
139.2	15429.6	580
139.3	15431.1	565
139.4	15432.5	533
139.5	15433.9	403
139.6	15435.3	259
139.7	15436.8	372
139.8	15438.2	367
139.9	15439.6	490
140	15441	583
140.1	15442.5	599
140.2	15443.9	672
140.3	15445.3	487
140.4	15446.7	536
140.5	15448.2	517
140.6	15449.6	397
140.7	15451	368
140.8	15452.4	411
140.9	15453.9	476
141	15455.3	461
141.1	15456.7	320
141.2	15458.1	363
141.3	15459.6	433
141.4	15461	438
141.5	15462.4	504
141.6	15463.9	457
141.7	15465.3	302
141.8	15466.7	408
141.9	15468.1	431
142	15469.6	304
142.1	15471	370
142.2	15472.4	428
142.3	15473.8	371
142.4	15475.3	386
142.5	15476.7	377
142.6	15478.1	389
142.7	15479.5	384
142.8	15481	395
142.9	15482.4	337
143	15483.8	322
143.1	15485.2	386
143.2	15486.7	404
143.3	15488.1	371
143.4	15489.5	324
143.5	15490.9	387
143.6	15492.4	418
143.7	15493.8	375
143.8	15495.2	406
143.9	15496.6	284
144	15498.1	380
144.1	15499.5	360
144.2	15500.9	455
144.3	15502.3	398
144.4	15503.8	308
144.5	15505.2	377
144.6	15506.6	455
144.7	15508.1	352
144.8	15509.5	375
144.9	15510.9	404
145	15512.3	331
145.1	15513.8	316
145.2	15515.2	394
145.3	15516.6	351
145.4	15518	478
145.5	15519.5	368
145.6	15520.9	286
145.7	15522.3	320
145.8	15523.7	287
145.9	15525.2	336
146	15526.6	374
146.1	15528	317
146.2	15529.4	407
146.3	15530.9	342
146.4	15532.3	409
146.5	15533.7	382
146.6	15535.1	343
146.7	15536.6	406
146.8	15538	514
146.9	15539.4	419
147	15540.8	432
147.1	15542.3	392
147.2	15543.7	387
147.3	15545.1	459
147.4	15546.6	318
147.5	15548	474
147.6	15549.4	448
147.7	15550.8	297
147.8	15552.3	457
147.9	15553.7	274
148	15555.1	276
148.1	15556.5	324
148.2	15558	256
148.3	15559.4	280
148.4	15560.8	344
148.5	15562.2	386
148.6	15563.7	343
148.7	15565.1	415
148.8	15566.5	265
148.9	15567.9	290
149	15569.4	292
149.1	15570.8	514
149.2	15572.2	534
149.3	15573.6	385
149.4	15575.1	359
149.5	15576.5	332
149.6	15577.9	296
149.7	15579.3	301
149.8	15580.8	185
149.9	15582.2	245
150	15583.6	286
150.1	15585.1	311
150.2	15586.5	405
150.3	15587.9	443
150.4	15589.3	410
150.5	15590.8	532
150.6	15592.2	496
150.7	15593.6	458
150.8	15595	517
150.9	15596.5	447
151	15597.9	415
151.1	15599.3	429
151.2	15600.7	456
151.3	15602.2	418
151.4	15603.6	596
151.5	15605	610
151.6	15606.4	561
151.7	15607.9	591
151.8	15609.3	534
151.9	15610.7	591
152	15612.1	489
152.1	15613.6	626
152.2	15615	465
152.3	15616.4	660
152.4	15617.8	705
152.5	15619.3	636
152.6	15620.7	660
152.7	15622.1	528
152.8	15623.6	648
152.9	15625	542
153	15626.4	521
153.1	15627.8	619
153.2	15629.3	695
153.3	15630.7	661
153.4	15632.1	604
153.5	15633.5	646
153.6	15635	608
153.7	15636.4	669
153.8	15637.8	596
153.9	15639.2	678
154	15640.7	660
154.1	15642.1	664
154.2	15643.5	637
154.3	15644.9	542
154.4	15646.4	590
154.5	15647.8	643
154.6	15649.2	698
154.7	15650.6	620
154.8	15652.1	631
154.9	15653.5	507
155	15654.9	604
155.1	15656.3	561
155.2	15657.8	531
155.3	15659.2	483
155.4	15660.6	523
155.5	15662.1	552
155.6	15663.5	648
155.7	15664.9	635
155.8	15666.3	586
155.9	15667.8	494
156	15669.2	354
156.1	15670.6	422
156.2	15672	317
156.3	15673.5	323
156.4	15674.9	372
156.5	15676.3	326
156.6	15677.7	329
156.7	15679.2	348
156.8	15680.6	408
156.9	15682	344
157	15683.4	288
157.1	15684.9	333
157.2	15686.3	425
157.3	15687.7	368
157.4	15689.1	367
157.5	15690.6	416
157.6	15692	474
157.7	15693.4	517
157.8	15694.8	532
157.9	15696.3	502
158	15697.7	605
158.1	15699.1	599
158.2	15700.5	589
158.3	15702	675
158.4	15703.4	578
158.5	15704.8	621
158.6	15706.3	641
158.7	15707.7	490
158.8	15709.1	514
158.9	15710.5	475
159	15712	471
159.1	15713.4	500
159.2	15714.8	583
159.3	15716.2	490
159.4	15717.7	522
159.5	15719.1	503
159.6	15720.5	556
159.7	15721.9	579
159.8	15723.4	593
159.9	15724.8	539
160	15726.2	579
160.1	15727.6	590
160.2	15729.1	564
160.3	15730.5	612
160.4	15731.9	526
160.5	15733.3	618
160.6	15734.8	549
160.7	15736.2	621
160.8	15737.6	510
160.9	15739	555
161	15740.5	575
161.1	15741.9	649
161.2	15743.3	473
161.3	15744.8	518
161.4	15746.2	519
161.5	15747.6	579
161.6	15749	497
161.7	15750.5	584
161.8	15751.9	496
161.9	15753.3	585
162	15754.7	564
162.1	15756.2	458
162.2	15757.6	531
162.3	15759	475
162.4	15760.4	434
162.5	15761.9	617
162.6	15763.3	555
162.7	15764.7	670
162.8	15766.1	568
162.9	15767.6	484
163	15769	486
163.1	15770.4	416
163.2	15771.8	500
163.3	15773.3	563
163.4	15774.7	505
163.5	15776.1	527
163.6	15777.5	395
163.7	15779	400
163.8	15780.4	492
163.9	15781.8	596
164	15783.3	517
164.1	15784.7	542
164.2	15786.1	518
164.3	15787.5	488
164.4	15789	469
164.5	15790.4	438
164.6	15791.8	441
164.7	15793.2	399
164.8	15794.7	446
164.9	15796.1	489
165	15797.5	465
165.1	15798.9	498
165.2	15800.4	590
165.3	15801.8	469
165.4	15803.2	348
165.5	15804.6	436
165.6	15806.1	395
165.7	15807.5	584
165.8	15808.9	580
165.9	15810.3	384
166	15811.8	413
166.1	15813.2	482
166.2	15814.6	498
166.3	15816	449
166.4	15817.5	494
166.5	15818.9	529
166.6	15820.3	663
166.7	15821.8	624
166.8	15823.2	666
166.9	15824.6	598
167	15826	553
167.1	15827.5	534
167.2	15828.9	565
167.3	15830.3	704
167.4	15831.7	640
167.5	15833.2	674
167.6	15834.6	618
167.7	15836	668
167.8	15837.4	725
167.9	15838.9	599
168	15840.3	711
168.1	15841.7	682
168.2	15843.1	595
168.3	15844.6	667
168.4	15846	653
168.5	15847.4	781
168.6	15848.8	609
168.7	15850.3	669
168.8	15851.7	637
168.9	15853.1	710
169	15854.5	665
169.1	15856	592
169.2	15857.4	607
169.3	15858.8	607
169.4	15860.3	673
169.5	15861.7	581
169.6	15863.1	479
169.7	15864.5	560
169.8	15866	670
169.9	15867.4	717
170	15868.8	623
170.1	15870.2	580
170.2	15871.7	634
170.3	15873.1	674
170.4	15874.5	729
170.5	15875.9	606
170.6	15877.4	622
170.7	15878.8	634
170.8	15880.2	695
170.9	15881.6	593
171	15883.1	422
171.1	15884.5	558
171.2	15885.9	657
171.3	15887.3	543
171.4	15888.8	578
171.5	15890.2	607
171.6	15891.6	431
171.7	15893	580
171.8	15894.5	479
171.9	15895.9	581
172	15897.3	686
172.1	15898.7	686
172.2	15900.2	634
172.3	15901.6	601
172.4	15903	701
172.5	15904.5	576
172.6	15905.9	677
172.7	15907.3	685
172.8	15908.7	722
172.9	15910.2	674
173	15911.6	594
173.1	15913	588
173.2	15914.4	635
173.3	15915.9	565
173.4	15917.3	485
173.5	15918.7	563
173.6	15920.1	588
173.7	15921.6	476
173.8	15923	497
173.9	15924.4	351
174	15925.8	354
174.1	15927.3	331
174.2	15928.7	319
174.3	15930.1	530
174.4	15931.5	440
174.5	15933	470
174.6	15934.4	474
174.7	15935.8	422
174.8	15937.2	415
174.9	15938.7	363
175	15940.1	404
175.1	15941.5	448
175.2	15943	399
175.3	15944.4	347
175.4	15945.8	463
175.5	15947.2	462
175.6	15948.7	774
175.7	15950.1	476
175.8	15951.5	513
175.9	15952.9	627
176	15954.4	552
176.1	15955.8	534
176.2	15957.2	557
176.3	15958.6	486
176.4	15960.1	484
176.5	15961.5	388
176.6	15962.9	381
176.7	15964.3	557
176.8	15965.8	486
176.9	15967.2	586
177	15968.6	693
177.1	15970	698
177.2	15971.5	661
177.3	15972.9	647
177.4	15974.3	614
177.5	15975.7	594
177.6	15977.2	672
177.7	15978.6	639
177.8	15980	609
177.9	15981.5	612
178	15982.9	587
178.1	15984.3	576
178.2	15985.7	612
178.3	15987.2	694
178.4	15988.6	710
178.5	15990	698
178.6	15991.4	713
178.7	15992.9	795
178.8	15994.3	674
178.9	15995.7	684
179	15997.1	731
179.1	15998.6	662
179.2	16000	621
179.3	16001.4	612
179.4	16002.8	602
179.5	16004.3	634
179.6	16005.7	644
179.7	16007.1	734
179.8	16008.5	636
179.9	16010	562
180	16011.4	649
180.1	16012.8	668
180.2	16014.2	505
180.3	16015.7	516
180.4	16017.1	547
180.5	16018.5	616
180.6	16020	502
180.7	16021.4	454
180.8	16022.8	420
180.9	16024.2	371
181	16025.7	425
181.1	16027.1	523
181.2	16028.5	429
181.3	16029.9	418
181.4	16031.4	500
181.5	16032.8	408
181.6	16034.2	493
181.7	16035.6	497
181.8	16037.1	437
181.9	16038.5	598
182	16039.9	605
182.1	16041.3	518
182.2	16042.8	575
182.3	16044.2	520
182.4	16045.6	367
182.5	16047	371
182.6	16048.5	500
182.7	16049.9	477
182.8	16051.3	469
182.9	16052.7	621
183	16054.2	647
183.1	16055.6	702
183.2	16057	678
183.3	16058.5	582
183.4	16059.9	558
183.5	16061.3	568
183.6	16062.7	634
183.7	16064.2	430
183.8	16065.6	465
183.9	16067	454
184	16068.4	324
184.1	16069.9	410
184.2	16071.3	522
184.3	16072.7	405
184.4	16074.1	321
184.5	16075.6	412
184.6	16077	548
184.7	16078.4	627
184.8	16079.8	587
184.9	16081.3	560
185	16082.7	507
185.1	16084.1	536
185.2	16085.5	355
185.3	16087	306
185.4	16088.4	476
185.5	16089.8	433
185.6	16091.2	626
185.7	16092.7	586
185.8	16094.1	584
185.9	16095.5	626
186	16097	555
186.1	16098.4	585
186.2	16099.8	612
186.3	16101.2	697
186.4	16102.7	566
186.5	16104.1	630
186.6	16105.5	744
186.7	16106.9	779
186.8	16108.4	656
186.9	16109.8	712
187	16111.2	655
187.1	16112.6	715
187.2	16114.1	620
187.3	16115.5	630
187.4	16116.9	632
187.5	16118.3	615
187.6	16119.8	696
187.7	16121.2	705
187.8	16122.6	572
187.9	16124	602
188	16125.5	614
188.1	16126.9	745
188.2	16128.3	634
188.3	16129.7	727
188.4	16131.2	649
188.5	16132.6	613
188.6	16134	642
188.7	16135.4	661
188.8	16136.9	675
188.9	16138.3	752
189	16139.7	693
189.1	16141.2	604
189.2	16142.6	707
189.3	16144	780
189.4	16145.4	744
189.5	16146.9	768
189.6	16148.3	632
189.7	16149.7	611
189.8	16151.1	650
189.9	16152.6	562
190	16154	572
190.1	16155.4	475
190.2	16156.8	660
190.3	16158.3	665
190.4	16159.7	572
190.5	16161.1	574
190.6	16162.5	563
190.7	16164	662
190.8	16165.4	647
190.9	16166.8	598
191	16168.2	562
191.1	16169.7	620
191.2	16171.1	714
191.3	16172.5	752
191.4	16173.9	589
191.5	16175.4	579
191.6	16176.8	604
191.7	16178.2	601
191.8	16179.7	628
191.9	16181.1	622
192	16182.5	696
192.1	16183.9	660
192.2	16185.4	649
192.3	16186.8	623
192.4	16188.2	538
192.5	16189.6	539
192.6	16191.1	361
192.7	16192.5	384
192.8	16193.9	502
192.9	16195.3	542
193	16196.8	419
193.1	16198.2	346
193.2	16199.6	390
193.3	16201	307
193.4	16202.5	222
193.5	16203.9	404
193.6	16205.3	373
193.7	16206.7	328
193.8	16208.2	257
193.9	16209.6	196
194	16211	248
194.1	16212.4	225
194.2	16213.9	231
194.3	16215.3	387
194.4	16216.7	609
194.5	16218.2	536
194.6	16219.6	635
194.7	16221	558
194.8	16222.4	403
194.9	16223.9	470
195	16225.3	412
195.1	16226.7	339
195.2	16228.1	211
195.3	16229.6	308
195.4	16231	343
195.5	16232.4	273
195.6	16233.8	414
195.7	16235.3	422
195.8	16236.7	452
195.9	16238.1	477
196	16239.5	411
196.1	16241	425
196.2	16242.4	403
196.3	16243.8	383
196.4	16245.2	413
196.5	16246.7	266
196.6	16248.1	299
196.7	16249.5	341
196.8	16250.9	327
196.9	16252.4	333
197	16253.8	495
197.1	16255.2	368
197.2	16256.7	269
197.3	16258.1	484
197.4	16259.5	364
197.5	16260.9	373
197.6	16262.4	359
197.7	16263.8	327
197.8	16265.2	326
197.9	16266.6	338
198	16268.1	359
198.1	16269.5	343
198.2	16270.9	422
198.3	16272.3	445
198.4	16273.8	466
198.5	16275.2	477
198.6	16276.6	486
198.7	16278	484
198.8	16279.5	499
198.9	16280.9	475
199	16282.3	506
199.1	16283.7	410
199.2	16285.2	331
199.3	16286.6	394
199.4	16288	354
199.5	16289.4	384
199.6	16290.9	445
199.7	16292.3	492
199.8	16293.7	644
199.9	16295.2	670
200	16296.6	683
200.1	16298	709
200.2	16299.4	690
200.3	16300.9	620
200.4	16302.3	586
200.5	16303.7	671
200.6	16305.1	614
200.7	16306.6	528
200.8	16308	460
200.9	16309.4	477
201	16310.8	318
201.1	16312.3	475
201.2	16313.7	509
201.3	16315.1	663
201.4	16316.5	645
201.5	16318	638
201.6	16319.4	556
201.7	16320.8	603
201.8	16322.2	562
201.9	16323.7	534
202	16325.1	526
202.1	16326.5	530
202.2	16327.9	529
202.3	16329.4	551
202.4	16330.8	504
202.5	16332.2	488
202.6	16333.6	563
202.7	16335.1	522
202.8	16336.5	392
202.9	16337.9	383
203	16339.4	375
203.1	16340.8	411
203.2	16342.2	439
203.3	16343.6	359
203.4	16345.1	308
203.5	16346.5	325
203.6	16347.9	412
203.7	16349.3	393
203.8	16350.8	257
203.9	16352.2	277
204	16353.6	267
204.1	16355	279
204.2	16356.5	335
204.3	16357.9	349
204.4	16359.3	219
204.5	16360.7	257
204.6	16362.2	407
204.7	16363.6	280
204.8	16365	309
204.9	16366.4	335
205	16367.9	453
205.1	16369.3	275
205.2	16370.7	464
205.3	16372.1	391
205.4	16373.6	286
205.5	16375	374
205.6	16376.4	481
205.7	16377.9	473
205.8	16379.3	209
205.9	16380.7	304
206	16382.1	390
206.1	16383.6	471
206.2	16385	509
206.3	16386.4	486
206.4	16387.8	342
206.5	16389.3	456
206.6	16390.7	339
206.7	16392.1	200
206.8	16393.5	237
206.9	16395	462
207	16396.4	382
207.1	16397.8	505
207.2	16399.2	447
207.3	16400.7	409
207.4	16402.1	319
207.5	16403.5	369
207.6	16404.9	272
207.7	16406.4	264
207.8	16407.8	292
207.9	16409.2	305
208	16410.6	307
208.1	16412.1	331
208.2	16413.5	329
208.3	16414.9	331
208.4	16416.4	309
208.5	16417.8	305
208.6	16419.2	404
208.7	16420.6	264
208.8	16422.1	313
208.9	16423.5	342
209	16424.9	341
209.1	16426.3	278
209.2	16427.8	338
209.3	16429.2	473
209.4	16430.6	518
209.5	16432	313
209.6	16433.5	348
209.7	16434.9	308
209.8	16436.3	331
209.9	16437.7	326
210	16439.2	470
210.1	16440.6	563
210.2	16442	512
210.3	16443.4	470
210.4	16444.9	505
210.5	16446.3	556
210.6	16447.7	465
[truncated: 729 more rows]
